# Supplementary material
Source: publisher figshare collection journal article supplement (https://karger.figshare.com/ndownloader/files/21807795)
Supplement: Supplementary file 1 [file 21807795]

| **No.** | **Accession no.** | **Description** | **Protein name - FASTA** | **129_N/126** |
| --- | --- | --- | --- | --- |
| 1 | P26022 | Pentraxin-related protein PTX3 OS=Homo sapiens GN=PTX3 PE=1 SV=3 - [PTX3_HUMAN] | Pentraxin-related protein PTX3 | 9.277 |
| 2 | Q9P2E9 | Ribosome-binding protein 1 OS=Homo sapiens GN=RRBP1 PE=1 SV=4 - [RRBP1_HUMAN] | Ribosome-binding protein 1 | 7.972 |
| 3 | Q02297 | Pro-neuregulin-1, membrane-bound isoform OS=Homo sapiens GN=NRG1 PE=1 SV=3 - [NRG1_HUMAN] | Pro-neuregulin-1, membrane-bound isoform | 7.674 |
| 4 | P05997 | Collagen alpha-2(V) chain OS=Homo sapiens GN=COL5A2 PE=1 SV=3 - [CO5A2_HUMAN] | Collagen alpha-2(V) chain (COL5A2) | 6.372 |
| 5 | P41221 | Protein Wnt-5a OS=Homo sapiens GN=WNT5A PE=1 SV=2 - [WNT5A_HUMAN] | Protein Wnt-5a | 6.031 |
| 6 | P05121 | Plasminogen activator inhibitor 1 OS=Homo sapiens GN=SERPINE1 PE=1 SV=1 - [PAI1_HUMAN] | Plasminogen activator inhibitor 1 | 5.139 |
| 7 | Q9Y6C2 | EMILIN-1 OS=Homo sapiens GN=EMILIN1 PE=1 SV=2 - [EMIL1_HUMAN] | EMILIN-1 | 5.009 |
| 8 | P06703 | Protein S100-A6 OS=Homo sapiens GN=S100A6 PE=1 SV=1 - [S10A6_HUMAN] | Protein S100-A6 | 4.732 |
| 9 | P12109 | Collagen alpha-1(VI) chain OS=Homo sapiens GN=COL6A1 PE=1 SV=3 - [CO6A1_HUMAN] | Collagen alpha-1(VI) chain (COL6A1) | 4.651 |
| 10 | P07093 | Glia-derived nexin OS=Homo sapiens GN=SERPINE2 PE=1 SV=1 - [GDN_HUMAN] | Glia-derived nexin | 4.563 |
| 11 | O60687 | Sushi repeat-containing protein SRPX2 OS=Homo sapiens GN=SRPX2 PE=1 SV=1 - [SRPX2_HUMAN] | Sushi repeat-containing protein SRPX2 | 4.499 |
| 12 | P08670 | Vimentin OS=Homo sapiens GN=VIM PE=1 SV=4 - [VIME_HUMAN] | Vimentin | 4.468 |
| 13 | P07602 | Prosaposin OS=Homo sapiens GN=PSAP PE=1 SV=2 - [SAP_HUMAN] | Prosaposin | 4.321 |
| 14 | P80303 | Nucleobindin-2 OS=Homo sapiens GN=NUCB2 PE=1 SV=2 - [NUCB2_HUMAN] | Nucleobindin-2 | 4.317 |
| 15 | Q96JC1 | Vam6/Vps39-like protein OS=Homo sapiens GN=VPS39 PE=1 SV=2 - [VPS39_HUMAN] | Vam6/Vps39-like protein | 4.316 |
| 16 | P09382 | Galectin-1 OS=Homo sapiens GN=LGALS1 PE=1 SV=2 - [LEG1_HUMAN] | Galectin-1 | 4.252 |
| 17 | P61916 | Epididymal secretory protein E1 OS=Homo sapiens GN=NPC2 PE=1 SV=1 - [NPC2_HUMAN] | NPC intracellular cholesterol transporter 2 | 4.234 |
| 18 | Q08397 | Lysyl oxidase homolog 1 OS=Homo sapiens GN=LOXL1 PE=1 SV=2 - [LOXL1_HUMAN] | Lysyl oxidase homolog 1 | 4.121 |
| 19 | P41250 | Glycine--tRNA ligase OS=Homo sapiens GN=GARS PE=1 SV=3 - [SYG_HUMAN] | Glycine--tRNA ligase | 4.120 |
| 20 | P07858 | Cathepsin B OS=Homo sapiens GN=CTSB PE=1 SV=3 - [CATB_HUMAN] | Cathepsin B | 4.016 |
| 21 | P07942 | Laminin subunit beta-1 OS=Homo sapiens GN=LAMB1 PE=1 SV=2 - [LAMB1_HUMAN] | Laminin subunit beta-1 | 4.004 |
| 22 | Q9Y4K0 | Lysyl oxidase homolog 2 OS=Homo sapiens GN=LOXL2 PE=1 SV=1 - [LOXL2_HUMAN] | Lysyl oxidase homolog 2 | 3.939 |
| 23 | O75326 | Semaphorin-7A OS=Homo sapiens GN=SEMA7A PE=1 SV=1 - [SEM7A_HUMAN] | Semaphorin-7A | 3.885 |
| 24 | Q14019 | Coactosin-like protein OS=Homo sapiens GN=COTL1 PE=1 SV=3 - [COTL1_HUMAN] | Coactosin-like protein | 3.882 |
| 25 | P43235 | Cathepsin K OS=Homo sapiens GN=CTSK PE=1 SV=1 - [CATK_HUMAN] | Cathepsin K | 3.863 |
| 26 | P52565 | Rho GDP-dissociation inhibitor 1 OS=Homo sapiens GN=ARHGDIA PE=1 SV=3 - [GDIR1_HUMAN] | Rho GDP-dissociation inhibitor 1 | 3.849 |
| 27 | P36222 | Chitinase-3-like protein 1 OS=Homo sapiens GN=CHI3L1 PE=1 SV=2 - [CH3L1_HUMAN] | Chitinase-3-like protein 1 | 3.817 |
| 28 | Q12841 | Follistatin-related protein 1 OS=Homo sapiens GN=FSTL1 PE=1 SV=1 - [FSTL1_HUMAN] | Follistatin-related protein 1 | 3.783 |
| 29 | Q11203 | CMP-N-acetylneuraminate-beta-1,4-galactoside alpha-2,3-sialyltransferase OS=Homo sapiens GN=ST3GAL3 PE=1 SV=1 - [SIAT6_HUMAN] | CMP-N-acetylneuraminate-beta-1,4-galactoside alpha-2,3-sialyltransferase | 3.737 |
| 30 | Q13510 | Acid ceramidase OS=Homo sapiens GN=ASAH1 PE=1 SV=5 - [ASAH1_HUMAN] | Acid ceramidase | 3.717 |
| 31 | P12110 | Collagen alpha-2(VI) chain OS=Homo sapiens GN=COL6A2 PE=1 SV=4 - [CO6A2_HUMAN] | Collagen alpha-2(VI) chain | 3.682 |
| 32 | P25391 | Laminin subunit alpha-1 OS=Homo sapiens GN=LAMA1 PE=1 SV=2 - [LAMA1_HUMAN] | Laminin subunit alpha-1 | 3.660 |
| 33 | P07585 | Decorin OS=Homo sapiens GN=DCN PE=1 SV=1 - [PGS2_HUMAN] | Decorin | 3.624 |
| 34 | P01033 | Metalloproteinase inhibitor 1 OS=Homo sapiens GN=TIMP1 PE=1 SV=1 - [TIMP1_HUMAN] | Metalloproteinase inhibitor 1 | 3.586 |
| 35 | P08253 | 72 kDa type IV collagenase OS=Homo sapiens GN=MMP2 PE=1 SV=2 - [MMP2_HUMAN] | 72 kDa type IV collagenase; Matrix metalloproteinase-2; Gelatinase A | 3.565 |
| 36 | P07339 | Cathepsin D OS=Homo sapiens GN=CTSD PE=1 SV=1 - [CATD_HUMAN] | Cathepsin D | 3.521 |
| 37 | P21810 | Biglycan OS=Homo sapiens GN=BGN PE=1 SV=2 - [PGS1_HUMAN] | Biglycan; Bone/cartilage proteoglycan I | 3.517 |
| 38 | P50395 | Rab GDP dissociation inhibitor beta OS=Homo sapiens GN=GDI2 PE=1 SV=2 - [GDIB_HUMAN] | Rab GDP dissociation inhibitor beta | 3.450 |
| 39 | Q99426 | Tubulin-folding cofactor B OS=Homo sapiens GN=TBCB PE=1 SV=2 - [TBCB_HUMAN] | Tubulin-folding cofactor B | 3.403 |
| 40 | P55072 | Transitional endoplasmic reticulum ATPase OS=Homo sapiens GN=VCP PE=1 SV=4 - [TERA_HUMAN] | Transitional endoplasmic reticulum ATPase | 3.349 |
| 41 | Q92743 | Serine protease HTRA1 OS=Homo sapiens GN=HTRA1 PE=1 SV=1 - [HTRA1_HUMAN] | Serine protease HTRA1 | 3.281 |
| 42 | P00749 | Urokinase-type plasminogen activator OS=Homo sapiens GN=PLAU PE=1 SV=2 - [UROK_HUMAN] | Urokinase-type plasminogen activator | 3.261 |
| 43 | P68104 | Elongation factor 1-alpha 1 OS=Homo sapiens GN=EEF1A1 PE=1 SV=1 - [EF1A1_HUMAN] | Elongation factor 1-alpha 1 | 3.234 |
| 44 | Q9BY76 | Angiopoietin-related protein 4 OS=Homo sapiens GN=ANGPTL4 PE=1 SV=2 - [ANGL4_HUMAN] | Angiopoietin-related protein 4 | 3.222 |
| 45 | P49767 | Vascular endothelial growth factor C OS=Homo sapiens GN=VEGFC PE=1 SV=1 - [VEGFC_HUMAN] | Vascular endothelial growth factor C | 3.221 |
| 46 | O95965 | Integrin beta-like protein 1 OS=Homo sapiens GN=ITGBL1 PE=2 SV=1 - [ITGBL_HUMAN] | Integrin beta-like protein 1 | 3.138 |
| 47 | Q16270 | Insulin-like growth factor-binding protein 7 OS=Homo sapiens GN=IGFBP7 PE=1 SV=1 - [IBP7_HUMAN] | Insulin-like growth factor-binding protein 7 | 3.108 |
| 48 | P11047 | Laminin subunit gamma-1 OS=Homo sapiens GN=LAMC1 PE=1 SV=3 - [LAMC1_HUMAN] | Laminin subunit gamma-1 | 3.097 |
| 49 | P22692 | Insulin-like growth factor-binding protein 4 OS=Homo sapiens GN=IGFBP4 PE=1 SV=2 - [IBP4_HUMAN] | Insulin-like growth factor-binding protein 4 | 3.073 |
| 50 | Q7Z7M9 | Polypeptide N-acetylgalactosaminyltransferase 5 OS=Homo sapiens GN=GALNT5 PE=1 SV=1 - [GALT5_HUMAN] | Polypeptide N-acetylgalactosaminyltransferase 5 | 3.036 |
| 51 | Q9BRK5 | 45 kDa calcium-binding protein OS=Homo sapiens GN=SDF4 PE=1 SV=1 - [CAB45_HUMAN] | 45 kDa calcium-binding protein | 3.022 |
| 52 | P07686 | Beta-hexosaminidase subunit beta OS=Homo sapiens GN=HEXB PE=1 SV=3 - [HEXB_HUMAN] | Beta-hexosaminidase subunit beta | 3.014 |
| 53 | P60033 | CD81 antigen OS=Homo sapiens GN=CD81 PE=1 SV=1 - [CD81_HUMAN] | CD81 antigen | 2.993 |
| 54 | P78539 | Sushi repeat-containing protein SRPX OS=Homo sapiens GN=SRPX PE=1 SV=1 - [SRPX_HUMAN] | Sushi repeat-containing protein SRPX | 2.966 |
| 55 | P60174 | Triosephosphate isomerase OS=Homo sapiens GN=TPI1 PE=1 SV=3 - [TPIS_HUMAN] | Triosephosphate isomerase | 2.933 |
| 56 | Q14767 | Latent-transforming growth factor beta-binding protein 2 OS=Homo sapiens GN=LTBP2 PE=1 SV=3 - [LTBP2_HUMAN] | Latent-transforming growth factor beta-binding protein 2 | 2.916 |
| 57 | P07711 | Cathepsin L1 OS=Homo sapiens GN=CTSL PE=1 SV=2 - [CATL1_HUMAN] | Cathepsin L1 | 2.891 |
| 58 | P35555 | Fibrillin-1 OS=Homo sapiens GN=FBN1 PE=1 SV=3 - [FBN1_HUMAN] | Fibrillin-1 | 2.866 |
| 59 | P08123 | Collagen alpha-2(I) chain OS=Homo sapiens GN=COL1A2 PE=1 SV=7 - [CO1A2_HUMAN] | Collagen alpha-2(I) chain | 2.865 |
| 60 | P13497 | Bone morphogenetic protein 1 OS=Homo sapiens GN=BMP1 PE=1 SV=2 - [BMP1_HUMAN] | Bone morphogenetic protein 1 | 2.855 |
| 61 | P14174 | Macrophage migration inhibitory factor OS=Homo sapiens GN=MIF PE=1 SV=4 - [MIF_HUMAN] | Macrophage migration inhibitory factor | 2.836 |
| 62 | P09486 | SPARC OS=Homo sapiens GN=SPARC PE=1 SV=1 - [SPRC_HUMAN] | SPARC; Osteonectin | 2.832 |
| 63 | Q16363 | Laminin subunit alpha-4 OS=Homo sapiens GN=LAMA4 PE=1 SV=4 - [LAMA4_HUMAN] | Laminin subunit alpha-4 | 2.830 |
| 64 | Q14393 | Growth arrest-specific protein 6 OS=Homo sapiens GN=GAS6 PE=1 SV=2 - [GAS6_HUMAN] | Growth arrest-specific protein 6 | 2.798 |
| 65 | Q15149 | Plectin OS=Homo sapiens GN=PLEC PE=1 SV=3 - [PLEC_HUMAN] | Plectin | 2.796 |
| 66 | P52823 | Stanniocalcin-1 OS=Homo sapiens GN=STC1 PE=1 SV=1 - [STC1_HUMAN] | Stanniocalcin-1 | 2.789 |
| 67 | P22392 | Nucleoside diphosphate kinase B OS=Homo sapiens GN=NME2 PE=1 SV=1 - [NDKB_HUMAN] | Nucleoside diphosphate kinase B | 2.784 |
| 68 | P19883 | Follistatin OS=Homo sapiens GN=FST PE=1 SV=2 - [FST_HUMAN] | Follistatin | 2.777 |
| 69 | Q9UBR2 | Cathepsin Z OS=Homo sapiens GN=CTSZ PE=1 SV=1 - [CATZ_HUMAN] | Cathepsin Z | 2.774 |
| 70 | P04083 | Annexin A1 OS=Homo sapiens GN=ANXA1 PE=1 SV=2 - [ANXA1_HUMAN] | Annexin A1 | 2.767 |
| 71 | Q9NRN5 | Olfactomedin-like protein 3 OS=Homo sapiens GN=OLFML3 PE=2 SV=1 - [OLFL3_HUMAN] | Olfactomedin-like protein 3 | 2.766 |
| 72 | Q15904 | V-type proton ATPase subunit S1 OS=Homo sapiens GN=ATP6AP1 PE=1 SV=2 - [VAS1_HUMAN] | V-type proton ATPase subunit S1 | 2.736 |
| 73 | O76061 | Stanniocalcin-2 OS=Homo sapiens GN=STC2 PE=1 SV=1 - [STC2_HUMAN] | Stanniocalcin-2 | 2.729 |
| 74 | P05387 | 60S acidic ribosomal protein P2 OS=Homo sapiens GN=RPLP2 PE=1 SV=1 - [RLA2_HUMAN] | 60S acidic ribosomal protein P2 | 2.711 |
| 75 | Q92626 | Peroxidasin homolog OS=Homo sapiens GN=PXDN PE=1 SV=2 - [PXDN_HUMAN] | Peroxidasin homolog | 2.692 |
| 76 | P12111 | Collagen alpha-3(VI) chain OS=Homo sapiens GN=COL6A3 PE=1 SV=5 - [CO6A3_HUMAN] | Collagen alpha-3(VI) chain (COL6A3) | 2.686 |
| 77 | Q09666 | Neuroblast differentiation-associated protein AHNAK OS=Homo sapiens GN=AHNAK PE=1 SV=2 - [AHNK_HUMAN] | Neuroblast differentiation-associated protein AHNAK | 2.660 |
| 78 | O00299 | Chloride intracellular channel protein 1 OS=Homo sapiens GN=CLIC1 PE=1 SV=4 - [CLIC1_HUMAN] | Chloride intracellular channel protein 1 | 2.646 |
| 79 | O14773 | Tripeptidyl-peptidase 1 OS=Homo sapiens GN=TPP1 PE=1 SV=2 - [TPP1_HUMAN] | Tripeptidyl-peptidase 1 | 2.626 |
| 80 | P29966 | Myristoylated alanine-rich C-kinase substrate OS=Homo sapiens GN=MARCKS PE=1 SV=4 - [MARCS_HUMAN] | Myristoylated alanine-rich C-kinase substrate | 2.618 |
| 81 | P02452 | Collagen alpha-1(I) chain OS=Homo sapiens GN=COL1A1 PE=1 SV=5 - [CO1A1_HUMAN] | Collagen alpha-1(I) chain (COL1A1) | 2.585 |
| 82 | P13639 | Elongation factor 2 OS=Homo sapiens GN=EEF2 PE=1 SV=4 - [EF2_HUMAN] | Elongation factor 2 | 2.574 |
| 83 | P03956 | Interstitial collagenase OS=Homo sapiens GN=MMP1 PE=1 SV=3 - [MMP1_HUMAN] | Interstitial collagenase; Matrix metalloproteinase-1 | 2.565 |
| 84 | P12814 | Alpha-actinin-1 OS=Homo sapiens GN=ACTN1 PE=1 SV=2 - [ACTN1_HUMAN] | Alpha-actinin-1 | 2.561 |
| 85 | P62857 | 40S ribosomal protein S28 OS=Homo sapiens GN=RPS28 PE=1 SV=1 - [RS28_HUMAN] | 40S ribosomal protein S28 | 2.549 |
| 86 | P35442 | Thrombospondin-2 OS=Homo sapiens GN=THBS2 PE=1 SV=2 - [TSP2_HUMAN] | Thrombospondin-2 | 2.536 |
| 87 | P02545 | Prelamin-A/C OS=Homo sapiens GN=LMNA PE=1 SV=1 - [LMNA_HUMAN] | Prelamin-A/C | 2.515 |
| 88 | O95967 | EGF-containing fibulin-like extracellular matrix protein 2 OS=Homo sapiens GN=EFEMP2 PE=1 SV=3 - [FBLN4_HUMAN] | EGF-containing fibulin-like extracellular matrix protein 2 | 2.513 |
| 89 | Q9NS15 | Latent-transforming growth factor beta-binding protein 3 OS=Homo sapiens GN=LTBP3 PE=1 SV=4 - [LTBP3_HUMAN] | Latent-transforming growth factor beta-binding protein 3 | 2.501 |
| 90 | P13284 | Gamma-interferon-inducible lysosomal thiol reductase OS=Homo sapiens GN=IFI30 PE=1 SV=3 - [GILT_HUMAN] | Gamma-interferon-inducible lysosomal thiol reductas | 2.500 |
| 91 | Q08629 | Testican-1 OS=Homo sapiens GN=SPOCK1 PE=1 SV=1 - [TICN1_HUMAN] | Testican-1 | 2.483 |
| 92 | P40925 | Malate dehydrogenase, cytoplasmic OS=Homo sapiens GN=MDH1 PE=1 SV=4 - [MDHC_HUMAN] | Malate dehydrogenase, cytoplasmic | 2.482 |
| 93 | Q15063 | Periostin OS=Homo sapiens GN=POSTN PE=1 SV=2 - [POSTN_HUMAN] | Periostin | 2.467 |
| 94 | Q15113 | Procollagen C-endopeptidase enhancer 1 OS=Homo sapiens GN=PCOLCE PE=1 SV=2 - [PCOC1_HUMAN] | Procollagen C-endopeptidase enhancer 1 | 2.427 |
| 95 | P35052 | Glypican-1 OS=Homo sapiens GN=GPC1 PE=1 SV=2 - [GPC1_HUMAN] | Glypican-1 | 2.420 |
| 96 | P20908 | Collagen alpha-1(V) chain OS=Homo sapiens GN=COL5A1 PE=1 SV=3 - [CO5A1_HUMAN] | Collagen alpha-1(V) chain (COL5A1) | 2.414 |
| 97 | Q96CG8 | Collagen triple helix repeat-containing protein 1 OS=Homo sapiens GN=CTHRC1 PE=1 SV=1 - [CTHR1_HUMAN] | Collagen triple helix repeat-containing protein 1 | 2.392 |
| 98 | P29279 | Connective tissue growth factor OS=Homo sapiens GN=CTGF PE=1 SV=2 - [CTGF_HUMAN] | Connective tissue growth factor | 2.391 |
| 99 | Q96KK5 | Histone H2A type 1-H OS=Homo sapiens GN=HIST1H2AH PE=1 SV=3 - [H2A1H_HUMAN] | Histone H2A type 1-H | 2.370 |
| 100 | P00338 | L-lactate dehydrogenase A chain OS=Homo sapiens GN=LDHA PE=1 SV=2 - [LDHA_HUMAN] | L-lactate dehydrogenase A chain | 2.366 |
| 101 | P61981 | 14-3-3 protein gamma OS=Homo sapiens GN=YWHAG PE=1 SV=2 - [1433G_HUMAN] | 14-3-3 protein gamma | 2.353 |
| 102 | Q14112 | Nidogen-2 OS=Homo sapiens GN=NID2 PE=1 SV=3 - [NID2_HUMAN] | Nidogen-2 | 2.340 |
| 103 | Q15582 | Transforming growth factor-beta-induced protein ig-h3 OS=Homo sapiens GN=TGFBI PE=1 SV=1 - [BGH3_HUMAN] | Transforming growth factor-beta-induced protein ig-h3 | 2.339 |
| 104 | O75787 | Renin receptor OS=Homo sapiens GN=ATP6AP2 PE=1 SV=2 - [RENR_HUMAN] | Renin receptor | 2.326 |
| 105 | Q02809 | Procollagen-lysine,2-oxoglutarate 5-dioxygenase 1 OS=Homo sapiens GN=PLOD1 PE=1 SV=2 - [PLOD1_HUMAN] | Procollagen-lysine,2-oxoglutarate 5-dioxygenase 1 | 2.276 |
| 106 | Q8NBJ4 | Golgi membrane protein 1 OS=Homo sapiens GN=GOLM1 PE=1 SV=1 - [GOLM1_HUMAN] | Golgi membrane protein 1 | 2.257 |
| 107 | Q9UNA0 | A disintegrin and metalloproteinase with thrombospondin motifs 5 OS=Homo sapiens GN=ADAMTS5 PE=1 SV=2 - [ATS5_HUMAN] | A disintegrin and metalloproteinase with thrombospondin motifs 5 | 2.249 |
| 108 | Q15084 | Protein disulfide-isomerase A6 OS=Homo sapiens GN=PDIA6 PE=1 SV=1 - [PDIA6_HUMAN] | Protein disulfide-isomerase A6 | 2.248 |
| 109 | P14618 | Pyruvate kinase PKM OS=Homo sapiens GN=PKM PE=1 SV=4 - [KPYM_HUMAN] | Pyruvate kinase PKM | 2.241 |
| 110 | P06865 | Beta-hexosaminidase subunit alpha OS=Homo sapiens GN=HEXA PE=1 SV=2 - [HEXA_HUMAN] | Beta-hexosaminidase subunit alpha | 2.238 |
| 111 | P17900 | Ganglioside GM2 activator OS=Homo sapiens GN=GM2A PE=1 SV=4 - [SAP3_HUMAN] | Ganglioside GM2 activator | 2.182 |
| 112 | Q07960 | Rho GTPase-activating protein 1 OS=Homo sapiens GN=ARHGAP1 PE=1 SV=1 - [RHG01_HUMAN] | Rho GTPase-activating protein 1 | 2.182 |
| 113 | P16278 | Beta-galactosidase OS=Homo sapiens GN=GLB1 PE=1 SV=2 - [BGAL_HUMAN] | Beta-galactosidase | 2.141 |
| 114 | P31946 | 14-3-3 protein beta/alpha OS=Homo sapiens GN=YWHAB PE=1 SV=3 - [1433B_HUMAN] | 14-3-3 protein beta/alpha | 2.138 |
| 115 | P04062 | Glucosylceramidase OS=Homo sapiens GN=GBA PE=1 SV=3 - [GLCM_HUMAN] | Glucosylceramidase | 2.136 |
| 116 | O14498 | Immunoglobulin superfamily containing leucine-rich repeat protein OS=Homo sapiens GN=ISLR PE=2 SV=1 - [ISLR_HUMAN] | Immunoglobulin superfamily containing leucine-rich repeat protein | 2.113 |
| 117 | Q02818 | Nucleobindin-1 OS=Homo sapiens GN=NUCB1 PE=1 SV=4 - [NUCB1_HUMAN] | Nucleobindin-1 | 2.095 |
| 118 | P09603 | Macrophage colony-stimulating factor 1 OS=Homo sapiens GN=CSF1 PE=1 SV=2 - [CSF1_HUMAN] | Macrophage colony-stimulating factor 1 | 2.088 |
| 119 | P02461 | Collagen alpha-1(III) chain OS=Homo sapiens GN=COL3A1 PE=1 SV=4 - [CO3A1_HUMAN] | Collagen alpha-1(III) chain (COL3A1) | 2.087 |
| 120 | P06733 | Alpha-enolase OS=Homo sapiens GN=ENO1 PE=1 SV=2 - [ENOA_HUMAN] | Alpha-enolase | 2.081 |
| 121 | P26038 | Moesin OS=Homo sapiens GN=MSN PE=1 SV=3 - [MOES_HUMAN] | Moesin | 2.075 |
| 122 | P30044 | Peroxiredoxin-5, mitochondrial OS=Homo sapiens GN=PRDX5 PE=1 SV=4 - [PRDX5_HUMAN] | Peroxiredoxin-5, mitochondrial | 2.056 |
| 123 | Q14766 | Latent-transforming growth factor beta-binding protein 1 OS=Homo sapiens GN=LTBP1 PE=1 SV=4 - [LTBP1_HUMAN] | Latent-transforming growth factor beta-binding protein 1 | 2.051 |
| 124 | P18669 | Phosphoglycerate mutase 1 OS=Homo sapiens GN=PGAM1 PE=1 SV=2 - [PGAM1_HUMAN] | Phosphoglycerate mutase 1 | 2.033 |
| 125 | Q9H4F8 | SPARC-related modular calcium-binding protein 1 OS=Homo sapiens GN=SMOC1 PE=1 SV=1 - [SMOC1_HUMAN] | SPARC-related modular calcium-binding protein 1 | 2.032 |
| 126 | P23528 | Cofilin-1 OS=Homo sapiens GN=CFL1 PE=1 SV=3 - [COF1_HUMAN] | Cofilin-1 | 2.030 |
| 127 | O60814 | Histone H2B type 1-K OS=Homo sapiens GN=HIST1H2BK PE=1 SV=3 - [H2B1K_HUMAN] | Histone H2B type 1-K | 2.026 |
| 128 | Q96HC4 | PDZ and LIM domain protein 5 OS=Homo sapiens GN=PDLIM5 PE=1 SV=5 - [PDLI5_HUMAN] | PDZ and LIM domain protein 5 | 2.023 |
| 129 | Q01518 | Adenylyl cyclase-associated protein 1 OS=Homo sapiens GN=CAP1 PE=1 SV=5 - [CAP1_HUMAN] | Adenylyl cyclase-associated protein 1 | 2.002 |
| 130 | P08476 | Inhibin beta A chain OS=Homo sapiens GN=INHBA PE=1 SV=2 - [INHBA_HUMAN] | Inhibin beta A chain | 1.986 |
| 131 | P10619 | Lysosomal protective protein OS=Homo sapiens GN=CTSA PE=1 SV=2 - [PPGB_HUMAN] | Lysosomal protective protein | 1.971 |
| 132 | P15586 | N-acetylglucosamine-6-sulfatase OS=Homo sapiens GN=GNS PE=1 SV=3 - [GNS_HUMAN] | N-acetylglucosamine-6-sulfatase | 1.960 |
| 133 | P04080 | Cystatin-B OS=Homo sapiens GN=CSTB PE=1 SV=2 - [CYTB_HUMAN] | Cystatin-B | 1.959 |
| 134 | P35579 | Myosin-9 OS=Homo sapiens GN=MYH9 PE=1 SV=4 - [MYH9_HUMAN] | Myosin-9 | 1.958 |
| 135 | Q16658 | Fascin OS=Homo sapiens GN=FSCN1 PE=1 SV=3 - [FSCN1_HUMAN] | Fascin | 1.945 |
| 136 | Q9Y240 | C-type lectin domain family 11 member A OS=Homo sapiens GN=CLEC11A PE=1 SV=1 - [CLC11_HUMAN] | C-type lectin domain family 11 member A | 1.923 |
| 137 | P34932 | Heat shock 70 kDa protein 4 OS=Homo sapiens GN=HSPA4 PE=1 SV=4 - [HSP74_HUMAN] | Heat shock 70 kDa protein 4 | 1.907 |
| 138 | P30101 | Protein disulfide-isomerase A3 OS=Homo sapiens GN=PDIA3 PE=1 SV=4 - [PDIA3_HUMAN] | Protein disulfide-isomerase A3 | 1.885 |
| 139 | P15311 | Ezrin OS=Homo sapiens GN=EZR PE=1 SV=4 - [EZRI_HUMAN] | Ezrin | 1.875 |
| 140 | Q8NHP8 | Putative phospholipase B-like 2 OS=Homo sapiens GN=PLBD2 PE=1 SV=2 - [PLBL2_HUMAN] | Putative phospholipase B-like 2 | 1.874 |
| 141 | Q14315 | Filamin-C OS=Homo sapiens GN=FLNC PE=1 SV=3 - [FLNC_HUMAN] | Filamin-C | 1.871 |
| 142 | Q96FQ6 | Protein S100-A16 OS=Homo sapiens GN=S100A16 PE=1 SV=1 - [S10AG_HUMAN] | Protein S100-A16 | 1.862 |
| 143 | Q9GZX9 | Twisted gastrulation protein homolog 1 OS=Homo sapiens GN=TWSG1 PE=1 SV=1 - [TWSG1_HUMAN] | Twisted gastrulation protein homolog 1 | 1.860 |
| 144 | P67936 | Tropomyosin alpha-4 chain OS=Homo sapiens GN=TPM4 PE=1 SV=3 - [TPM4_HUMAN] | Tropomyosin alpha-4 chain | 1.859 |
| 145 | Q9H299 | SH3 domain-binding glutamic acid-rich-like protein 3 OS=Homo sapiens GN=SH3BGRL3 PE=1 SV=1 - [SH3L3_HUMAN] | SH3 domain-binding glutamic acid-rich-like protein 3 | 1.852 |
| 146 | P15289 | Arylsulfatase A OS=Homo sapiens GN=ARSA PE=1 SV=3 - [ARSA_HUMAN] | Arylsulfatase A | 1.848 |
| 147 | P28799 | Granulins OS=Homo sapiens GN=GRN PE=1 SV=2 - [GRN_HUMAN] | Granulins | 1.848 |
| 148 | P60709 | Actin, cytoplasmic 1 OS=Homo sapiens GN=ACTB PE=1 SV=1 - [ACTB_HUMAN] | Actin, cytoplasmic 1 | 1.844 |
| 149 | P05067 | Amyloid beta A4 protein OS=Homo sapiens GN=APP PE=1 SV=3 - [A4_HUMAN] | Amyloid beta A4 protein | 1.820 |
| 150 | Q10471 | Polypeptide N-acetylgalactosaminyltransferase 2 OS=Homo sapiens GN=GALNT2 PE=1 SV=1 - [GALT2_HUMAN] | Polypeptide N-acetylgalactosaminyltransferase 2 | 1.820 |
| 151 | P08238 | Heat shock protein HSP 90-beta OS=Homo sapiens GN=HSP90AB1 PE=1 SV=4 - [HS90B_HUMAN] | Heat shock protein HSP 90-beta | 1.819 |
| 152 | P62937 | Peptidyl-prolyl cis-trans isomerase A OS=Homo sapiens GN=PPIA PE=1 SV=2 - [PPIA_HUMAN] | Peptidyl-prolyl cis-trans isomerase A OS=Homo sapie | 1.816 |
| 153 | P20810 | Calpastatin OS=Homo sapiens GN=CAST PE=1 SV=4 - [ICAL_HUMAN] | Calpastatin | 1.793 |
| 154 | P80723 | Brain acid soluble protein 1 OS=Homo sapiens GN=BASP1 PE=1 SV=2 - [BASP1_HUMAN] | Brain acid soluble protein 1 | 1.790 |
| 155 | P26572 | Alpha-1,3-mannosyl-glycoprotein 2-beta-N-acetylglucosaminyltransferase OS=Homo sapiens GN=MGAT1 PE=1 SV=2 - [MGAT1_HUMAN] | Alpha-1,3-mannosyl-glycoprotein 2-beta-N-acetylgluc | 1.780 |
| 156 | P55884 | Eukaryotic translation initiation factor 3 subunit B OS=Homo sapiens GN=EIF3B PE=1 SV=3 - [EIF3B_HUMAN] | Eukaryotic translation initiation factor 3 subunit B | 1.778 |
| 157 | Q99536 | Synaptic vesicle membrane protein VAT-1 homolog OS=Homo sapiens GN=VAT1 PE=1 SV=2 - [VAT1_HUMAN] | Synaptic vesicle membrane protein VAT-1 homolog | 1.775 |
| 158 | P49368 | T-complex protein 1 subunit gamma OS=Homo sapiens GN=CCT3 PE=1 SV=4 - [TCPG_HUMAN] | T-complex protein 1 subunit gamma | 1.774 |
| 159 | Q06830 | Peroxiredoxin-1 OS=Homo sapiens GN=PRDX1 PE=1 SV=1 - [PRDX1_HUMAN] | Peroxiredoxin-1 | 1.764 |
| 160 | P55287 | Cadherin-11 OS=Homo sapiens GN=CDH11 PE=2 SV=2 - [CAD11_HUMAN] | Cadherin-11 | 1.763 |
| 161 | P24592 | Insulin-like growth factor-binding protein 6 OS=Homo sapiens GN=IGFBP6 PE=1 SV=1 - [IBP6_HUMAN] | Insulin-like growth factor-binding protein 6 | 1.763 |
| 162 | P00441 | Superoxide dismutase [Cu-Zn] OS=Homo sapiens GN=SOD1 PE=1 SV=2 - [SODC_HUMAN] | Superoxide dismutase [Cu-Zn] | 1.760 |
| 163 | O94985 | Calsyntenin-1 OS=Homo sapiens GN=CLSTN1 PE=1 SV=1 - [CSTN1_HUMAN] | Calsyntenin-1 | 1.745 |
| 164 | O15511 | Actin-related protein 2/3 complex subunit 5 OS=Homo sapiens GN=ARPC5 PE=1 SV=3 - [ARPC5_HUMAN] | Actin-related protein 2/3 complex subunit 5 | 1.727 |
| 165 | P16035 | Metalloproteinase inhibitor 2 OS=Homo sapiens GN=TIMP2 PE=1 SV=2 - [TIMP2_HUMAN] | Metalloproteinase inhibitor 2 | 1.723 |
| 166 | Q9UBP4 | Dickkopf-related protein 3 OS=Homo sapiens GN=DKK3 PE=1 SV=2 - [DKK3_HUMAN] | Dickkopf-related protein 3 | 1.719 |
| 167 | P19013 | Keratin, type II cytoskeletal 4 OS=Homo sapiens GN=KRT4 PE=1 SV=4 - [K2C4_HUMAN] | Keratin, type II cytoskeletal 4 | 1.702 |
| 168 | Q93063 | Exostosin-2 OS=Homo sapiens GN=EXT2 PE=1 SV=1 - [EXT2_HUMAN] | Exostosin-2 | 1.698 |
| 169 | P13716 | Delta-aminolevulinic acid dehydratase OS=Homo sapiens GN=ALAD PE=1 SV=1 - [HEM2_HUMAN] | Delta-aminolevulinic acid dehydratase | 1.698 |
| 170 | Q9BQE3 | Tubulin alpha-1C chain OS=Homo sapiens GN=TUBA1C PE=1 SV=1 - [TBA1C_HUMAN] | Tubulin alpha-1C chain OS=Homo sapiens GN=TUBA1C PE | 1.697 |
| 171 | P04406 | Glyceraldehyde-3-phosphate dehydrogenase OS=Homo sapiens GN=GAPDH PE=1 SV=3 - [G3P_HUMAN] | Glyceraldehyde-3-phosphate dehydrogenase | 1.695 |
| 172 | O60701 | UDP-glucose 6-dehydrogenase OS=Homo sapiens GN=UGDH PE=1 SV=1 - [UGDH_HUMAN] | UDP-glucose 6-dehydrogenase | 1.682 |
| 173 | O43707 | Alpha-actinin-4 OS=Homo sapiens GN=ACTN4 PE=1 SV=2 - [ACTN4_HUMAN] | Alpha-actinin-4 | 1.668 |
| 174 | Q15365 | Poly(rC)-binding protein 1 OS=Homo sapiens GN=PCBP1 PE=1 SV=2 - [PCBP1_HUMAN] | Poly(rC)-binding protein 1 | 1.668 |
| 175 | Q76M96 | Coiled-coil domain-containing protein 80 OS=Homo sapiens GN=CCDC80 PE=1 SV=1 - [CCD80_HUMAN] | Coiled-coil domain-containing protein 80 | 1.659 |
| 176 | P63167 | Dynein light chain 1, cytoplasmic OS=Homo sapiens GN=DYNLL1 PE=1 SV=1 - [DYL1_HUMAN] | Dynein light chain 1, cytoplasmic | 1.649 |
| 177 | P02751 | Fibronectin OS=Homo sapiens GN=FN1 PE=1 SV=4 - [FINC_HUMAN] | Fibronectin | 1.621 |
| 178 | Q14118 | Dystroglycan OS=Homo sapiens GN=DAG1 PE=1 SV=2 - [DAG1_HUMAN] | Dystroglycan | 1.590 |
| 179 | Q14166 | Tubulin--tyrosine ligase-like protein 12 OS=Homo sapiens GN=TTLL12 PE=1 SV=2 - [TTL12_HUMAN] | Tubulin--tyrosine ligase-like protein 12 | 1.583 |
| 180 | P13987 | CD59 glycoprotein OS=Homo sapiens GN=CD59 PE=1 SV=1 - [CD59_HUMAN] | CD59 glycoprotein | 1.577 |
| 181 | P01889 | HLA class I histocompatibility antigen, B-7 alpha chain OS=Homo sapiens GN=HLA-B PE=1 SV=3 - [1B07_HUMAN] | HLA class I histocompatibility antigen, B-7 alpha chain | 1.574 |
| 182 | P40926 | Malate dehydrogenase, mitochondrial OS=Homo sapiens GN=MDH2 PE=1 SV=3 - [MDHM_HUMAN] | Malate dehydrogenase, mitochondrial | 1.571 |
| 183 | Q05682 | Caldesmon OS=Homo sapiens GN=CALD1 PE=1 SV=3 - [CALD1_HUMAN] | Caldesmon | 1.561 |
| 184 | P21333 | Filamin-A OS=Homo sapiens GN=FLNA PE=1 SV=4 - [FLNA_HUMAN] | Filamin-A | 1.555 |
| 185 | P10124 | Serglycin OS=Homo sapiens GN=SRGN PE=1 SV=3 - [SRGN_HUMAN] | Serglycin | 1.554 |
| 186 | P10599 | Thioredoxin OS=Homo sapiens GN=TXN PE=1 SV=3 - [THIO_HUMAN] | Thioredoxin | 1.552 |
| 187 | Q9HCU0 | Endosialin OS=Homo sapiens GN=CD248 PE=1 SV=1 - [CD248_HUMAN] | Endosialin | 1.550 |
| 188 | O75503 | Ceroid-lipofuscinosis neuronal protein 5 OS=Homo sapiens GN=CLN5 PE=1 SV=2 - [CLN5_HUMAN] | Ceroid-lipofuscinosis neuronal protein 5 | 1.534 |
| 189 | A6NMY6 | Putative annexin A2-like protein OS=Homo sapiens GN=ANXA2P2 PE=5 SV=2 - [AXA2L_HUMAN] | Putative annexin A2-like protein | 1.532 |
| 190 | P07737 | Profilin-1 OS=Homo sapiens GN=PFN1 PE=1 SV=2 - [PROF1_HUMAN] | Profilin-1 | 1.512 |
| 191 | Q92520 | Protein FAM3C OS=Homo sapiens GN=FAM3C PE=1 SV=1 - [FAM3C_HUMAN] | Protein FAM3C | 1.501 |
| 192 | P05388 | 60S acidic ribosomal protein P0 OS=Homo sapiens GN=RPLP0 PE=1 SV=1 - [RLA0_HUMAN] | 60S acidic ribosomal protein P0 | 1.495 |
| 193 | P0CG48 | Polyubiquitin-C OS=Homo sapiens GN=UBC PE=1 SV=3 - [UBC_HUMAN] | Polyubiquitin-C | 1.495 |
| 194 | P27797 | Calreticulin OS=Homo sapiens GN=CALR PE=1 SV=1 - [CALR_HUMAN] | Calreticulin | 1.493 |
| 195 | P06748 | Nucleophosmin OS=Homo sapiens GN=NPM1 PE=1 SV=2 - [NPM_HUMAN] | Nucleophosmin | 1.493 |
| 196 | P11142 | Heat shock cognate 71 kDa protein OS=Homo sapiens GN=HSPA8 PE=1 SV=1 - [HSP7C_HUMAN] | Heat shock cognate 71 kDa protein OS=Homo sapiens G | 1.487 |
| 197 | P25788 | Proteasome subunit alpha type-3 OS=Homo sapiens GN=PSMA3 PE=1 SV=2 - [PSA3_HUMAN] | Proteasome subunit alpha type-3 | 1.479 |
| 198 | P98160 | Basement membrane-specific heparan sulfate proteoglycan core protein OS=Homo sapiens GN=HSPG2 PE=1 SV=4 - [PGBM_HUMAN] | Basement membrane-specific heparan sulfate proteoglycan core protein | 1.473 |
| 199 | Q99436 | Proteasome subunit beta type-7 OS=Homo sapiens GN=PSMB7 PE=1 SV=1 - [PSB7_HUMAN] | Proteasome subunit beta type-7 | 1.472 |
| 200 | P07195 | L-lactate dehydrogenase B chain OS=Homo sapiens GN=LDHB PE=1 SV=2 - [LDHB_HUMAN] | L-lactate dehydrogenase B chain | 1.471 |
| 201 | Q9HAT2 | Sialate O-acetylesterase OS=Homo sapiens GN=SIAE PE=1 SV=1 - [SIAE_HUMAN] | Sialate O-acetylesterase | 1.471 |
| 202 | Q6NXT2 | Histone H3.3C OS=Homo sapiens GN=H3F3C PE=1 SV=3 - [H3C_HUMAN] | Histone H3.3C | 1.470 |
| 203 | P60660 | Myosin light polypeptide 6 OS=Homo sapiens GN=MYL6 PE=1 SV=2 - [MYL6_HUMAN] | Myosin light polypeptide 6 | 1.464 |
| 204 | P62805 | Histone H4 OS=Homo sapiens GN=HIST1H4A PE=1 SV=2 - [H4_HUMAN] | Histone H4 | 1.462 |
| 205 | P61769 | Beta-2-microglobulin OS=Homo sapiens GN=B2M PE=1 SV=1 - [B2MG_HUMAN] | Beta-2-microglobulin | 1.456 |
| 206 | P17858 | ATP-dependent 6-phosphofructokinase, liver type OS=Homo sapiens GN=PFKL PE=1 SV=6 - [PFKAL_HUMAN] | ATP-dependent 6-phosphofructokinase, liver type | 1.432 |
| 207 | P22314 | Ubiquitin-like modifier-activating enzyme 1 OS=Homo sapiens GN=UBA1 PE=1 SV=3 - [UBA1_HUMAN] | Ubiquitin-like modifier-activating enzyme 1 | 1.431 |
| 208 | P13611 | Versican core protein OS=Homo sapiens GN=VCAN PE=1 SV=3 - [CSPG2_HUMAN] | Versican core protein | 1.426 |
| 209 | P05120 | Plasminogen activator inhibitor 2 OS=Homo sapiens GN=SERPINB2 PE=1 SV=2 - [PAI2_HUMAN] | Plasminogen activator inhibitor 2 | 1.425 |
| 210 | Q14697 | Neutral alpha-glucosidase AB OS=Homo sapiens GN=GANAB PE=1 SV=3 - [GANAB_HUMAN] | Neutral alpha-glucosidase AB | 1.419 |
| 211 | P01034 | Cystatin-C OS=Homo sapiens GN=CST3 PE=1 SV=1 - [CYTC_HUMAN] | Cystatin-C | 1.417 |
| 212 | P63104 | 14-3-3 protein zeta/delta OS=Homo sapiens GN=YWHAZ PE=1 SV=1 - [1433Z_HUMAN] | 14-3-3 protein zeta/delta | 1.414 |
| 213 | Q8IXL6 | Extracellular serine/threonine protein kinase FAM20C OS=Homo sapiens GN=FAM20C PE=1 SV=2 - [FA20C_HUMAN] | Extracellular serine/threonine protein kinase FAM20C | 1.408 |
| 214 | Q9H0U4 | Ras-related protein Rab-1B OS=Homo sapiens GN=RAB1B PE=1 SV=1 - [RAB1B_HUMAN] | Ras-related protein Rab-1B | 1.408 |
| 215 | P31150 | Rab GDP dissociation inhibitor alpha OS=Homo sapiens GN=GDI1 PE=1 SV=2 - [GDIA_HUMAN] | Rab GDP dissociation inhibitor alpha | 1.408 |
| 216 | P25786 | Proteasome subunit alpha type-1 OS=Homo sapiens GN=PSMA1 PE=1 SV=1 - [PSA1_HUMAN] | Proteasome subunit alpha type-1 | 1.403 |
| 217 | P60900 | Proteasome subunit alpha type-6 OS=Homo sapiens GN=PSMA6 PE=1 SV=1 - [PSA6_HUMAN] | Proteasome subunit alpha type-6 | 1.402 |
| 218 | Q9BTY2 | Plasma alpha-L-fucosidase OS=Homo sapiens GN=FUCA2 PE=1 SV=2 - [FUCO2_HUMAN] | Plasma alpha-L-fucosidase | 1.396 |
| 219 | P00558 | Phosphoglycerate kinase 1 OS=Homo sapiens GN=PGK1 PE=1 SV=3 - [PGK1_HUMAN] | Phosphoglycerate kinase 1 | 1.392 |
| 220 | P50552 | Vasodilator-stimulated phosphoprotein OS=Homo sapiens GN=VASP PE=1 SV=3 - [VASP_HUMAN] | Vasodilator-stimulated phosphoprotein | 1.389 |
| 221 | Q07954 | Prolow-density lipoprotein receptor-related protein 1 OS=Homo sapiens GN=LRP1 PE=1 SV=2 - [LRP1_HUMAN] | Prolow-density lipoprotein receptor-related protein | 1.388 |
| 222 | P55056 | Apolipoprotein C-IV OS=Homo sapiens GN=APOC4 PE=1 SV=1 - [APOC4_HUMAN] | Apolipoprotein C-IV | 1.378 |
| 223 | P09972 | Fructose-bisphosphate aldolase C OS=Homo sapiens GN=ALDOC PE=1 SV=2 - [ALDOC_HUMAN] | Fructose-bisphosphate aldolase C | 1.362 |
| 224 | P55268 | Laminin subunit beta-2 OS=Homo sapiens GN=LAMB2 PE=1 SV=2 - [LAMB2_HUMAN] | Laminin subunit beta-2 | 1.357 |
| 225 | O14818 | Proteasome subunit alpha type-7 OS=Homo sapiens GN=PSMA7 PE=1 SV=1 - [PSA7_HUMAN] | Proteasome subunit alpha type-7 | 1.356 |
| 226 | P17813 | Endoglin OS=Homo sapiens GN=ENG PE=1 SV=2 - [EGLN_HUMAN] | Endoglin | 1.350 |
| 227 | Q9BRK3 | Matrix-remodeling-associated protein 8 OS=Homo sapiens GN=MXRA8 PE=1 SV=1 - [MXRA8_HUMAN] | Matrix-remodeling-associated protein 8 | 1.348 |
| 228 | Q8NBP7 | Proprotein convertase subtilisin/kexin type 9 OS=Homo sapiens GN=PCSK9 PE=1 SV=3 - [PCSK9_HUMAN] | Proprotein convertase subtilisin/kexin type 9 | 1.347 |
| 229 | Q16851 | UTP--glucose-1-phosphate uridylyltransferase OS=Homo sapiens GN=UGP2 PE=1 SV=5 - [UGPA_HUMAN] | UTP--glucose-1-phosphate uridylyltransferase | 1.338 |
| 230 | P61106 | Ras-related protein Rab-14 OS=Homo sapiens GN=RAB14 PE=1 SV=4 - [RAB14_HUMAN] | Ras-related protein Rab-14 | 1.335 |
| 231 | Q7Z7G0 | Target of Nesh-SH3 OS=Homo sapiens GN=ABI3BP PE=1 SV=1 - [TARSH_HUMAN] | Target of Nesh-SH3 | 1.319 |
| 232 | P07237 | Protein disulfide-isomerase OS=Homo sapiens GN=P4HB PE=1 SV=3 - [PDIA1_HUMAN] | Protein disulfide-isomerase | 1.310 |
| 233 | P13646 | Keratin, type I cytoskeletal 13 OS=Homo sapiens GN=KRT13 PE=1 SV=4 - [K1C13_HUMAN] | Keratin, type I cytoskeletal 13 | 1.304 |
| 234 | P17931 | Galectin-3 OS=Homo sapiens GN=LGALS3 PE=1 SV=5 - [LEG3_HUMAN] | Galectin-3 | 1.304 |
| 235 | P04075 | Fructose-bisphosphate aldolase A OS=Homo sapiens GN=ALDOA PE=1 SV=2 - [ALDOA_HUMAN] | Fructose-bisphosphate aldolase A | 1.302 |
| 236 | Q92878 | DNA repair protein RAD50 OS=Homo sapiens GN=RAD50 PE=1 SV=1 - [RAD50_HUMAN] | DNA repair protein RAD50 | 1.294 |
| 237 | P32942 | Intercellular adhesion molecule 3 OS=Homo sapiens GN=ICAM3 PE=1 SV=2 - [ICAM3_HUMAN] | Intercellular adhesion molecule 3 | 1.293 |
| 238 | P37802 | Transgelin-2 OS=Homo sapiens GN=TAGLN2 PE=1 SV=3 - [TAGL2_HUMAN] | Transgelin-2 | 1.289 |
| 239 | P62491 | Ras-related protein Rab-11A OS=Homo sapiens GN=RAB11A PE=1 SV=3 - [RB11A_HUMAN] | Ras-related protein Rab-11A | 1.286 |
| 240 | P84157 | Matrix-remodeling-associated protein 7 OS=Homo sapiens GN=MXRA7 PE=1 SV=1 - [MXRA7_HUMAN] | Matrix-remodeling-associated protein 7 | 1.283 |
| 241 | P37837 | Transaldolase OS=Homo sapiens GN=TALDO1 PE=1 SV=2 - [TALDO_HUMAN] | Transaldolase | 1.281 |
| 242 | P30041 | Peroxiredoxin-6 OS=Homo sapiens GN=PRDX6 PE=1 SV=3 - [PRDX6_HUMAN] | Peroxiredoxin-6 | 1.280 |
| 243 | Q03167 | Transforming growth factor beta receptor type 3 OS=Homo sapiens GN=TGFBR3 PE=1 SV=3 - [TGBR3_HUMAN] | Transforming growth factor beta receptor type 3 OS= | 1.279 |
| 244 | Q96S96 | Phosphatidylethanolamine-binding protein 4 OS=Homo sapiens GN=PEBP4 PE=1 SV=3 - [PEBP4_HUMAN] | Phosphatidylethanolamine-binding protein 4 | 1.266 |
| 245 | P50897 | Palmitoyl-protein thioesterase 1 OS=Homo sapiens GN=PPT1 PE=1 SV=1 - [PPT1_HUMAN] | Palmitoyl-protein thioesterase 1 | 1.262 |
| 246 | P19021 | Peptidyl-glycine alpha-amidating monooxygenase OS=Homo sapiens GN=PAM PE=1 SV=2 - [AMD_HUMAN] | Peptidyl-glycine alpha-amidating monooxygenase | 1.261 |
| 247 | Q12907 | Vesicular integral-membrane protein VIP36 OS=Homo sapiens GN=LMAN2 PE=1 SV=1 - [LMAN2_HUMAN] | Vesicular integral-membrane protein VIP36 | 1.258 |
| 248 | P78417 | Glutathione S-transferase omega-1 OS=Homo sapiens GN=GSTO1 PE=1 SV=2 - [GSTO1_HUMAN] | Glutathione S-transferase omega-1 | 1.253 |
| 249 | Q8N465 | D-2-hydroxyglutarate dehydrogenase, mitochondrial OS=Homo sapiens GN=D2HGDH PE=1 SV=3 - [D2HDH_HUMAN] | D-2-hydroxyglutarate dehydrogenase, mitochondrial | 1.253 |
| 250 | P69849 | Nodal modulator 3 OS=Homo sapiens GN=NOMO3 PE=3 SV=2 - [NOMO3_HUMAN] | Nodal modulator 3 | 1.250 |
| 251 | O00391 | Sulfhydryl oxidase 1 OS=Homo sapiens GN=QSOX1 PE=1 SV=3 - [QSOX1_HUMAN] | Sulfhydryl oxidase 1 | 1.247 |
| 252 | Q8TER0 | Sushi, nidogen and EGF-like domain-containing protein 1 OS=Homo sapiens GN=SNED1 PE=2 SV=2 - [SNED1_HUMAN] | Sushi, nidogen and EGF-like domain-containing protein 1 | 1.246 |
| 253 | O43505 | Beta-1,4-glucuronyltransferase 1 OS=Homo sapiens GN=B4GAT1 PE=1 SV=1 - [B4GA1_HUMAN] | Beta-1,4-glucuronyltransferase 1 | 1.239 |
| 254 | Q5UCC4 | ER membrane protein complex subunit 10 OS=Homo sapiens GN=EMC10 PE=1 SV=1 - [EMC10_HUMAN] | ER membrane protein complex subunit 10 | 1.236 |
| 255 | Q92859 | Neogenin OS=Homo sapiens GN=NEO1 PE=1 SV=2 - [NEO1_HUMAN] | Neogenin | 1.232 |
| 256 | Q86U17 | Serpin A11 OS=Homo sapiens GN=SERPINA11 PE=2 SV=2 - [SPA11_HUMAN] | Serpin A11 | 1.231 |
| 257 | Q99497 | Protein deglycase DJ-1 OS=Homo sapiens GN=PARK7 PE=1 SV=2 - [PARK7_HUMAN] | Protein deglycase DJ-1 | 1.226 |
| 258 | Q6YHK3 | CD109 antigen OS=Homo sapiens GN=CD109 PE=1 SV=2 - [CD109_HUMAN] | CD109 antigen | 1.219 |
| 259 | P04792 | Heat shock protein beta-1 OS=Homo sapiens GN=HSPB1 PE=1 SV=2 - [HSPB1_HUMAN] | Heat shock protein beta-1 | 1.215 |
| 260 | Q6GTS8 | N-fatty-acyl-amino acid synthase/hydrolase PM20D1 OS=Homo sapiens GN=PM20D1 PE=2 SV=3 - [P20D1_HUMAN] | N-fatty-acyl-amino acid synthase/hydrolase PM20D1 | 1.209 |
| 261 | A0A0C4DH33 | Immunoglobulin heavy variable 1-24 OS=Homo sapiens GN=IGHV1-24 PE=3 SV=1 - [HV124_HUMAN] | Immunoglobulin heavy variable 1-24 | 1.204 |
| 262 | P18206 | Vinculin OS=Homo sapiens GN=VCL PE=1 SV=4 - [VINC_HUMAN] | Vinculin | 1.201 |
| 263 | Q6EMK4 | Vasorin OS=Homo sapiens GN=VASN PE=1 SV=1 - [VASN_HUMAN] | Vasorin | 1.196 |
| 264 | P05089 | Arginase-1 OS=Homo sapiens GN=ARG1 PE=1 SV=2 - [ARGI1_HUMAN] | Arginase-1 | 1.192 |
| 265 | P15144 | Aminopeptidase N OS=Homo sapiens GN=ANPEP PE=1 SV=4 - [AMPN_HUMAN] | Aminopeptidase N | 1.192 |
| 266 | P14209 | CD99 antigen OS=Homo sapiens GN=CD99 PE=1 SV=1 - [CD99_HUMAN] | CD99 antigen | 1.192 |
| 267 | P24821 | Tenascin OS=Homo sapiens GN=TNC PE=1 SV=3 - [TENA_HUMAN] | Tenascin | 1.188 |
| 268 | O75874 | Isocitrate dehydrogenase [NADP] cytoplasmic OS=Homo sapiens GN=IDH1 PE=1 SV=2 - [IDHC_HUMAN] | Isocitrate dehydrogenase [NADP] cytoplasmic | 1.176 |
| 269 | P42785 | Lysosomal Pro-X carboxypeptidase OS=Homo sapiens GN=PRCP PE=1 SV=1 - [PCP_HUMAN] | Lysosomal Pro-X carboxypeptidase | 1.173 |
| 270 | P31025 | Lipocalin-1 OS=Homo sapiens GN=LCN1 PE=1 SV=1 - [LCN1_HUMAN] | Lipocalin-1 | 1.172 |
| 271 | P29401 | Transketolase OS=Homo sapiens GN=TKT PE=1 SV=3 - [TKT_HUMAN] | Transketolase | 1.168 |
| 272 | P36871 | Phosphoglucomutase-1 OS=Homo sapiens GN=PGM1 PE=1 SV=3 - [PGM1_HUMAN] | Phosphoglucomutase-1 | 1.167 |
| 273 | P40189 | Interleukin-6 receptor subunit beta OS=Homo sapiens GN=IL6ST PE=1 SV=2 - [IL6RB_HUMAN] | Interleukin-6 receptor subunit beta | 1.165 |
| 274 | P05362 | Intercellular adhesion molecule 1 OS=Homo sapiens GN=ICAM1 PE=1 SV=2 - [ICAM1_HUMAN] | Intercellular adhesion molecule 1 | 1.160 |
| 275 | Q9NSB2 | Keratin, type II cuticular Hb4 OS=Homo sapiens GN=KRT84 PE=2 SV=2 - [KRT84_HUMAN] | Keratin, type II cuticular Hb4 | 1.160 |
| 276 | Q9Y4L1 | Hypoxia up-regulated protein 1 OS=Homo sapiens GN=HYOU1 PE=1 SV=1 - [HYOU1_HUMAN] | Hypoxia up-regulated protein 1 | 1.159 |
| 277 | O14786 | Neuropilin-1 OS=Homo sapiens GN=NRP1 PE=1 SV=3 - [NRP1_HUMAN] | Neuropilin-1 | 1.152 |
| 278 | O94876 | Transmembrane and coiled-coil domains protein 1 OS=Homo sapiens GN=TMCC1 PE=1 SV=3 - [TMCC1_HUMAN] | Transmembrane and coiled-coil domains protein 1 | 1.151 |
| 279 | P04745 | Alpha-amylase 1 OS=Homo sapiens GN=AMY1A PE=1 SV=2 - [AMY1_HUMAN] | Alpha-amylase 1 | 1.148 |
| 280 | A0A075B6Q5 | Immunoglobulin heavy variable 3-64 OS=Homo sapiens GN=IGHV3-64 PE=3 SV=1 - [HV364_HUMAN] | Immunoglobulin heavy variable 3-64 | 1.145 |
| 281 | P80188 | Neutrophil gelatinase-associated lipocalin OS=Homo sapiens GN=LCN2 PE=1 SV=2 - [NGAL_HUMAN] | Neutrophil gelatinase-associated lipocalin | 1.140 |
| 282 | O43493 | Trans-Golgi network integral membrane protein 2 OS=Homo sapiens GN=TGOLN2 PE=1 SV=2 - [TGON2_HUMAN] | Trans-Golgi network integral membrane protein 2 | 1.139 |
| 283 | O94919 | Endonuclease domain-containing 1 protein OS=Homo sapiens GN=ENDOD1 PE=1 SV=2 - [ENDD1_HUMAN] | Endonuclease domain-containing 1 protein | 1.139 |
| 284 | Q13423 | NAD(P) transhydrogenase, mitochondrial OS=Homo sapiens GN=NNT PE=1 SV=3 - [NNTM_HUMAN] | NAD(P) transhydrogenase, mitochondrial | 1.135 |
| 285 | Q9NZ08 | Endoplasmic reticulum aminopeptidase 1 OS=Homo sapiens GN=ERAP1 PE=1 SV=3 - [ERAP1_HUMAN] | Endoplasmic reticulum aminopeptidase 1 | 1.133 |
| 286 | P48637 | Glutathione synthetase OS=Homo sapiens GN=GSS PE=1 SV=1 - [GSHB_HUMAN] | Glutathione synthetase | 1.131 |
| 287 | Q9H6X2 | Anthrax toxin receptor 1 OS=Homo sapiens GN=ANTXR1 PE=1 SV=2 - [ANTR1_HUMAN] | Anthrax toxin receptor 1 | 1.130 |
| 288 | P15924 | Desmoplakin OS=Homo sapiens GN=DSP PE=1 SV=3 - [DESP_HUMAN] | Desmoplakin | 1.129 |
| 289 | Q9BS26 | Endoplasmic reticulum resident protein 44 OS=Homo sapiens GN=ERP44 PE=1 SV=1 - [ERP44_HUMAN] | Endoplasmic reticulum resident protein 44 | 1.123 |
| 290 | P10586 | Receptor-type tyrosine-protein phosphatase F OS=Homo sapiens GN=PTPRF PE=1 SV=2 - [PTPRF_HUMAN] | Receptor-type tyrosine-protein phosphatase F | 1.118 |
| 291 | Q04695 | Keratin, type I cytoskeletal 17 OS=Homo sapiens GN=KRT17 PE=1 SV=2 - [K1C17_HUMAN] | Keratin, type I cytoskeletal 17 | 1.118 |
| 292 | P09960 | Leukotriene A-4 hydrolase OS=Homo sapiens GN=LTA4H PE=1 SV=2 - [LKHA4_HUMAN] | Leukotriene A-4 hydrolase | 1.117 |
| 293 | P35527 | Keratin, type I cytoskeletal 9 OS=Homo sapiens GN=KRT9 PE=1 SV=3 - [K1C9_HUMAN] | Keratin, type I cytoskeletal 9 | 1.116 |
| 294 | Q8WZ75 | Roundabout homolog 4 OS=Homo sapiens GN=ROBO4 PE=1 SV=1 - [ROBO4_HUMAN] | Roundabout homolog 4 | 1.115 |
| 295 | P19022 | Cadherin-2 OS=Homo sapiens GN=CDH2 PE=1 SV=4 - [CADH2_HUMAN] | Cadherin-2 | 1.113 |
| 296 | A0A0C4DH39 | Immunoglobulin heavy variable 1-58 OS=Homo sapiens GN=IGHV1-58 PE=3 SV=1 - [HV158_HUMAN] | Immunoglobulin heavy variable 1-58 | 1.111 |
| 297 | P14923 | Junction plakoglobin OS=Homo sapiens GN=JUP PE=1 SV=3 - [PLAK_HUMAN] | Junction plakoglobin | 1.109 |
| 298 | P00390 | Glutathione reductase, mitochondrial OS=Homo sapiens GN=GSR PE=1 SV=2 - [GSHR_HUMAN] | Glutathione reductase, mitochondrial | 1.109 |
| 299 | P01601 | Immunoglobulin kappa variable 1D-16 (Fragment) OS=Homo sapiens GN=IGKV1D-16 PE=3 SV=2 - [KVD16_HUMAN] | Immunoglobulin kappa variable 1D-16 (Fragment) | 1.105 |
| 300 | Q15465 | Sonic hedgehog protein OS=Homo sapiens GN=SHH PE=1 SV=1 - [SHH_HUMAN] | Sonic hedgehog protein | 1.104 |
| 301 | Q15517 | Corneodesmosin OS=Homo sapiens GN=CDSN PE=1 SV=3 - [CDSN_HUMAN] | Corneodesmosin | 1.104 |
| 302 | P01036 | Cystatin-S OS=Homo sapiens GN=CST4 PE=1 SV=3 - [CYTS_HUMAN] | Cystatin-S | 1.100 |
| 303 | P16070 | CD44 antigen OS=Homo sapiens GN=CD44 PE=1 SV=3 - [CD44_HUMAN] | CD44 antigen | 1.099 |
| 304 | P31944 | Caspase-14 OS=Homo sapiens GN=CASP14 PE=1 SV=2 - [CASPE_HUMAN] | Caspase-14 | 1.098 |
| 305 | P41222 | Prostaglandin-H2 D-isomerase OS=Homo sapiens GN=PTGDS PE=1 SV=1 - [PTGDS_HUMAN] | Prostaglandin-H2 D-isomerase | 1.096 |
| 306 | Q02413 | Desmoglein-1 OS=Homo sapiens GN=DSG1 PE=1 SV=2 - [DSG1_HUMAN] | Desmoglein-1 | 1.095 |
| 307 | Q12860 | Contactin-1 OS=Homo sapiens GN=CNTN1 PE=1 SV=1 - [CNTN1_HUMAN] | Contactin-1 | 1.090 |
| 308 | A0A0B4J1U3 | Immunoglobulin lambda variable 1-36 OS=Homo sapiens GN=IGLV1-36 PE=3 SV=5 - [LV136_HUMAN] | Immunoglobulin lambda variable 1-36 | 1.089 |
| 309 | Q8N1N4 | Keratin, type II cytoskeletal 78 OS=Homo sapiens GN=KRT78 PE=2 SV=2 - [K2C78_HUMAN] | Keratin, type II cytoskeletal 78 | 1.088 |
| 310 | Q16853 | Membrane primary amine oxidase OS=Homo sapiens GN=AOC3 PE=1 SV=3 - [AOC3_HUMAN] | Membrane primary amine oxidase | 1.087 |
| 311 | Q9HCU9 | Breast cancer metastasis-suppressor 1 OS=Homo sapiens GN=BRMS1 PE=1 SV=1 - [BRMS1_HUMAN] | Breast cancer metastasis-suppressor 1 | 1.087 |
| 312 | Q9P232 | Contactin-3 OS=Homo sapiens GN=CNTN3 PE=1 SV=3 - [CNTN3_HUMAN] | Contactin-3 | 1.086 |
| 313 | Q08554 | Desmocollin-1 OS=Homo sapiens GN=DSC1 PE=1 SV=2 - [DSC1_HUMAN] | Desmocollin-1 | 1.086 |
| 314 | P14625 | Endoplasmin OS=Homo sapiens GN=HSP90B1 PE=1 SV=1 - [ENPL_HUMAN] | Endoplasmin | 1.085 |
| 315 | P05109 | Protein S100-A8 OS=Homo sapiens GN=S100A8 PE=1 SV=1 - [S10A8_HUMAN] | Protein S100-A8 | 1.085 |
| 316 | Q9Y646 | Carboxypeptidase Q OS=Homo sapiens GN=CPQ PE=1 SV=1 - [CBPQ_HUMAN] | Carboxypeptidase Q | 1.085 |
| 317 | Q86YW5 | Trem-like transcript 1 protein OS=Homo sapiens GN=TREML1 PE=1 SV=2 - [TRML1_HUMAN] | Trem-like transcript 1 protein | 1.085 |
| 318 | Q02985 | Complement factor H-related protein 3 OS=Homo sapiens GN=CFHR3 PE=1 SV=2 - [FHR3_HUMAN] | Complement factor H-related protein 3 | 1.081 |
| 319 | O43299 | AP-5 complex subunit zeta-1 OS=Homo sapiens GN=AP5Z1 PE=1 SV=2 - [AP5Z1_HUMAN] | AP-5 complex subunit zeta-1 | 1.078 |
| 320 | Q6UWP8 | Suprabasin OS=Homo sapiens GN=SBSN PE=1 SV=2 - [SBSN_HUMAN] | Suprabasin | 1.077 |
| 321 | Q12913 | Receptor-type tyrosine-protein phosphatase eta OS=Homo sapiens GN=PTPRJ PE=1 SV=3 - [PTPRJ_HUMAN] | Receptor-type tyrosine-protein phosphatase eta | 1.076 |
| 322 | Q08380 | Galectin-3-binding protein OS=Homo sapiens GN=LGALS3BP PE=1 SV=1 - [LG3BP_HUMAN] | Galectin-3-binding protein | 1.075 |
| 323 | P06732 | Creatine kinase M-type OS=Homo sapiens GN=CKM PE=1 SV=2 - [KCRM_HUMAN] | Creatine kinase M-type | 1.074 |
| 324 | Q9UBG0 | C-type mannose receptor 2 OS=Homo sapiens GN=MRC2 PE=1 SV=2 - [MRC2_HUMAN] | C-type mannose receptor 2 | 1.072 |
| 325 | P61026 | Ras-related protein Rab-10 OS=Homo sapiens GN=RAB10 PE=1 SV=1 - [RAB10_HUMAN] | Ras-related protein Rab-10 | 1.070 |
| 326 | P13647 | Keratin, type II cytoskeletal 5 OS=Homo sapiens GN=KRT5 PE=1 SV=3 - [K2C5_HUMAN] | Keratin, type II cytoskeletal 5 | 1.069 |
| 327 | P14543 | Nidogen-1 OS=Homo sapiens GN=NID1 PE=1 SV=3 - [NID1_HUMAN] | Nidogen-1 | 1.069 |
| 328 | A0A0C4DH29 | Immunoglobulin heavy variable 1-3 OS=Homo sapiens GN=IGHV1-3 PE=3 SV=1 - [HV103_HUMAN] | Immunoglobulin heavy variable 1-3 | 1.065 |
| 329 | P35916 | Vascular endothelial growth factor receptor 3 OS=Homo sapiens GN=FLT4 PE=1 SV=3 - [VGFR3_HUMAN] | Vascular endothelial growth factor receptor 3 | 1.064 |
| 330 | Q13228 | Selenium-binding protein 1 OS=Homo sapiens GN=SELENBP1 PE=1 SV=2 - [SBP1_HUMAN] | Selenium-binding protein 1 | 1.059 |
| 331 | Q13822 | Ectonucleotide pyrophosphatase/phosphodiesterase family member 2 OS=Homo sapiens GN=ENPP2 PE=1 SV=3 - [ENPP2_HUMAN] | Ectonucleotide pyrophosphatase/phosphodiesterase family member 2 | 1.058 |
| 332 | Q86YZ3 | Hornerin OS=Homo sapiens GN=HRNR PE=1 SV=2 - [HORN_HUMAN] | Hornerin | 1.057 |
| 333 | A0A075B6S6 | Immunoglobulin kappa variable 2D-30 OS=Homo sapiens GN=IGKV2D-30 PE=3 SV=1 - [KVD30_HUMAN] | Immunoglobulin kappa variable 2D-30 | 1.056 |
| 334 | Q9Y2Y8 | Proteoglycan 3 OS=Homo sapiens GN=PRG3 PE=1 SV=2 - [PRG3_HUMAN] | Proteoglycan 3 | 1.056 |
| 335 | Q9UJJ9 | N-acetylglucosamine-1-phosphotransferase subunit gamma OS=Homo sapiens GN=GNPTG PE=1 SV=1 - [GNPTG_HUMAN] | N-acetylglucosamine-1-phosphotransferase subunit gamma | 1.055 |
| 336 | P11021 | 78 kDa glucose-regulated protein OS=Homo sapiens GN=HSPA5 PE=1 SV=2 - [GRP78_HUMAN] | 78 kDa glucose-regulated protein | 1.052 |
| 337 | P05062 | Fructose-bisphosphate aldolase B OS=Homo sapiens GN=ALDOB PE=1 SV=2 - [ALDOB_HUMAN] | Fructose-bisphosphate aldolase B | 1.050 |
| 338 | P20930 | Filaggrin OS=Homo sapiens GN=FLG PE=1 SV=3 - [FILA_HUMAN] | Filaggrin | 1.046 |
| 339 | P02533 | Keratin, type I cytoskeletal 14 OS=Homo sapiens GN=KRT14 PE=1 SV=4 - [K1C14_HUMAN] | Keratin, type I cytoskeletal 14 | 1.045 |
| 340 | P07384 | Calpain-1 catalytic subunit OS=Homo sapiens GN=CAPN1 PE=1 SV=1 - [CAN1_HUMAN] | Calpain-1 catalytic subunit | 1.044 |
| 341 | Q9UNN8 | Endothelial protein C receptor OS=Homo sapiens GN=PROCR PE=1 SV=1 - [EPCR_HUMAN] | Endothelial protein C receptor | 1.044 |
| 342 | P13591 | Neural cell adhesion molecule 1 OS=Homo sapiens GN=NCAM1 PE=1 SV=3 - [NCAM1_HUMAN] | Neural cell adhesion molecule 1 | 1.042 |
| 343 | P01743 | Immunoglobulin heavy variable 1-46 OS=Homo sapiens GN=IGHV1-46 PE=1 SV=2 - [HV146_HUMAN] | Immunoglobulin heavy variable 1-46 | 1.041 |
| 344 | P05556 | Integrin beta-1 OS=Homo sapiens GN=ITGB1 PE=1 SV=2 - [ITB1_HUMAN] | Integrin beta-1 | 1.041 |
| 345 | P04040 | Catalase OS=Homo sapiens GN=CAT PE=1 SV=3 - [CATA_HUMAN] | Catalase | 1.041 |
| 346 | P39060 | Collagen alpha-1(XVIII) chain OS=Homo sapiens GN=COL18A1 PE=1 SV=5 - [COIA1_HUMAN] | Collagen alpha-1(XVIII) chain (COL18A1) | 1.040 |
| 347 | O14917 | Protocadherin-17 OS=Homo sapiens GN=PCDH17 PE=2 SV=2 - [PCD17_HUMAN] | Protocadherin-17 | 1.040 |
| 348 | Q5TEU4 | Arginine-hydroxylase NDUFAF5, mitochondrial OS=Homo sapiens GN=NDUFAF5 PE=1 SV=1 - [NDUF5_HUMAN] | Arginine-hydroxylase NDUFAF5, mitochondrial | 1.037 |
| 349 | P31151 | Protein S100-A7 OS=Homo sapiens GN=S100A7 PE=1 SV=4 - [S10A7_HUMAN] | Protein S100-A7 | 1.036 |
| 350 | Q15389 | Angiopoietin-1 OS=Homo sapiens GN=ANGPT1 PE=1 SV=2 - [ANGP1_HUMAN] | Angiopoietin-1 | 1.035 |
| 351 | Q13421 | Mesothelin OS=Homo sapiens GN=MSLN PE=1 SV=2 - [MSLN_HUMAN] | Mesothelin | 1.035 |
| 352 | P35908 | Keratin, type II cytoskeletal 2 epidermal OS=Homo sapiens GN=KRT2 PE=1 SV=2 - [K22E_HUMAN] | Keratin, type II cytoskeletal 2 epidermal | 1.034 |
| 353 | P01714 | Immunoglobulin lambda variable 3-19 OS=Homo sapiens GN=IGLV3-19 PE=1 SV=2 - [LV319_HUMAN] | Immunoglobulin lambda variable 3-19 | 1.033 |
| 354 | Q9UM47 | Neurogenic locus notch homolog protein 3 OS=Homo sapiens GN=NOTCH3 PE=1 SV=2 - [NOTC3_HUMAN] | Neurogenic locus notch homolog protein 3 | 1.033 |
| 355 | Q9HCB6 | Spondin-1 OS=Homo sapiens GN=SPON1 PE=1 SV=2 - [SPON1_HUMAN] | Spondin-1 | 1.032 |
| 356 | P40197 | Platelet glycoprotein V OS=Homo sapiens GN=GP5 PE=1 SV=1 - [GPV_HUMAN] | Platelet glycoprotein V | 1.030 |
| 357 | P13473 | Lysosome-associated membrane glycoprotein 2 OS=Homo sapiens GN=LAMP2 PE=1 SV=2 - [LAMP2_HUMAN] | Lysosome-associated membrane glycoprotein 2 | 1.030 |
| 358 | P04264 | Keratin, type II cytoskeletal 1 OS=Homo sapiens GN=KRT1 PE=1 SV=6 - [K2C1_HUMAN] | Keratin, type II cytoskeletal 1 | 1.025 |
| 359 | Q9NTU7 | Cerebellin-4 OS=Homo sapiens GN=CBLN4 PE=1 SV=1 - [CBLN4_HUMAN] | Cerebellin-4 | 1.023 |
| 360 | Q12805 | EGF-containing fibulin-like extracellular matrix protein 1 OS=Homo sapiens GN=EFEMP1 PE=1 SV=2 - [FBLN3_HUMAN] | EGF-containing fibulin-like extracellular matrix protein 1 | 1.023 |
| 361 | Q99714 | 3-hydroxyacyl-CoA dehydrogenase type-2 OS=Homo sapiens GN=HSD17B10 PE=1 SV=3 - [HCD2_HUMAN] | 3-hydroxyacyl-CoA dehydrogenase type-2 | 1.022 |
| 362 | Q7Z3B1 | Neuronal growth regulator 1 OS=Homo sapiens GN=NEGR1 PE=1 SV=3 - [NEGR1_HUMAN] | Neuronal growth regulator 1 | 1.019 |
| 363 | A0A075B6K6 | Immunoglobulin lambda variable 4-3 OS=Homo sapiens GN=IGLV4-3 PE=3 SV=1 - [LV403_HUMAN] | Immunoglobulin lambda variable 4-3 | 1.019 |
| 364 | A0A0A0MS14 | Immunoglobulin heavy variable 1-45 OS=Homo sapiens GN=IGHV1-45 PE=3 SV=1 - [HV145_HUMAN] | Immunoglobulin heavy variable 1-45 | 1.017 |
| 365 | P01817 | Immunoglobulin heavy variable 2-5 OS=Homo sapiens GN=IGHV2-5 PE=1 SV=2 - [HV205_HUMAN] | Immunoglobulin heavy variable 2-5 | 1.015 |
| 366 | P45877 | Peptidyl-prolyl cis-trans isomerase C OS=Homo sapiens GN=PPIC PE=1 SV=1 - [PPIC_HUMAN] | Peptidyl-prolyl cis-trans isomerase C | 1.015 |
| 367 | P09467 | Fructose-1,6-bisphosphatase 1 OS=Homo sapiens GN=FBP1 PE=1 SV=5 - [F16P1_HUMAN] | Fructose-1,6-bisphosphatase 1 | 1.014 |
| 368 | Q9Y490 | Talin-1 OS=Homo sapiens GN=TLN1 PE=1 SV=3 - [TLN1_HUMAN] | Talin-1 | 1.013 |
| 369 | P30740 | Leukocyte elastase inhibitor OS=Homo sapiens GN=SERPINB1 PE=1 SV=1 - [ILEU_HUMAN] | Leukocyte elastase inhibitor | 1.012 |
| 370 | P12273 | Prolactin-inducible protein OS=Homo sapiens GN=PIP PE=1 SV=1 - [PIP_HUMAN] | Prolactin-inducible protein | 1.010 |
| 371 | Q9UKY3 | Putative inactive carboxylesterase 4 OS=Homo sapiens GN=CES1P1 PE=5 SV=2 - [CES1P_HUMAN] | Putative inactive carboxylesterase 4 | 1.008 |
| 372 | Q92820 | Gamma-glutamyl hydrolase OS=Homo sapiens GN=GGH PE=1 SV=2 - [GGH_HUMAN] | Gamma-glutamyl hydrolase | 1.005 |
| 373 | Q9NVM4 | Protein arginine N-methyltransferase 7 OS=Homo sapiens GN=PRMT7 PE=1 SV=1 - [ANM7_HUMAN] | Protein arginine N-methyltransferase 7 | 1.005 |
| 374 | A0A0A0MT36 | Immunoglobulin kappa variable 6D-21 OS=Homo sapiens GN=IGKV6D-21 PE=3 SV=1 - [KVD21_HUMAN] | Immunoglobulin kappa variable 6D-21 | 1.002 |
| 375 | P06702 | Protein S100-A9 OS=Homo sapiens GN=S100A9 PE=1 SV=1 - [S10A9_HUMAN] | Protein S100-A9 | 1.001 |
| 376 | P19320 | Vascular cell adhesion protein 1 OS=Homo sapiens GN=VCAM1 PE=1 SV=1 - [VCAM1_HUMAN] | Vascular cell adhesion protein 1 | 1.000 |
| 377 | P07333 | Macrophage colony-stimulating factor 1 receptor OS=Homo sapiens GN=CSF1R PE=1 SV=2 - [CSF1R_HUMAN] | Macrophage colony-stimulating factor 1 receptor | 1.000 |
| 378 | Q9NZ09 | Ubiquitin-associated protein 1 OS=Homo sapiens GN=UBAP1 PE=1 SV=1 - [UBAP1_HUMAN] | Ubiquitin-associated protein 1 | 0.999 |
| 379 | P33908 | Mannosyl-oligosaccharide 1,2-alpha-mannosidase IA OS=Homo sapiens GN=MAN1A1 PE=1 SV=3 - [MA1A1_HUMAN] | Mannosyl-oligosaccharide 1,2-alpha-mannosidase IA | 0.999 |
| 380 | P16109 | P-selectin OS=Homo sapiens GN=SELP PE=1 SV=3 - [LYAM3_HUMAN] | P-selectin | 0.998 |
| 381 | O00187 | Mannan-binding lectin serine protease 2 OS=Homo sapiens GN=MASP2 PE=1 SV=4 - [MASP2_HUMAN] | Mannan-binding lectin serine protease 2 | 0.997 |
| 382 | Q5T749 | Keratinocyte proline-rich protein OS=Homo sapiens GN=KPRP PE=1 SV=1 - [KPRP_HUMAN] | Keratinocyte proline-rich protein | 0.995 |
| 383 | P55290 | Cadherin-13 OS=Homo sapiens GN=CDH13 PE=1 SV=1 - [CAD13_HUMAN] | Cadherin-13 | 0.994 |
| 384 | Q53RD9 | Fibulin-7 OS=Homo sapiens GN=FBLN7 PE=2 SV=1 - [FBLN7_HUMAN] | Fibulin-7 | 0.991 |
| 385 | A0A0B4J1V2 | Immunoglobulin heavy variable 2-26 OS=Homo sapiens GN=IGHV2-26 PE=3 SV=1 - [HV226_HUMAN] | Immunoglobulin heavy variable 2-26 | 0.990 |
| 386 | P22897 | Macrophage mannose receptor 1 OS=Homo sapiens GN=MRC1 PE=1 SV=1 - [MRC1_HUMAN] | Macrophage mannose receptor 1 | 0.989 |
| 387 | Q01459 | Di-N-acetylchitobiase OS=Homo sapiens GN=CTBS PE=1 SV=1 - [DIAC_HUMAN] | Di-N-acetylchitobiase | 0.988 |
| 388 | A6NIZ1 | Ras-related protein Rap-1b-like protein OS=Homo sapiens PE=2 SV=1 - [RP1BL_HUMAN] | Ras-related protein Rap-1b-like protein | 0.988 |
| 389 | Q6UXB8 | Peptidase inhibitor 16 OS=Homo sapiens GN=PI16 PE=1 SV=1 - [PI16_HUMAN] | Peptidase inhibitor 16 | 0.987 |
| 390 | O43432 | Eukaryotic translation initiation factor 4 gamma 3 OS=Homo sapiens GN=EIF4G3 PE=1 SV=2 - [IF4G3_HUMAN] | Eukaryotic translation initiation factor 4 gamma 3 | 0.986 |
| 391 | P43121 | Cell surface glycoprotein MUC18 OS=Homo sapiens GN=MCAM PE=1 SV=2 - [MUC18_HUMAN] | Cell surface glycoprotein MUC18 | 0.985 |
| 392 | P78563 | Double-stranded RNA-specific editase 1 OS=Homo sapiens GN=ADARB1 PE=1 SV=1 - [RED1_HUMAN] | Double-stranded RNA-specific editase 1 | 0.984 |
| 393 | Q8N6C8 | Leukocyte immunoglobulin-like receptor subfamily A member 3 OS=Homo sapiens GN=LILRA3 PE=1 SV=3 - [LIRA3_HUMAN] | Leukocyte immunoglobulin-like receptor subfamily A member 3 | 0.983 |
| 394 | Q86UD1 | Out at first protein homolog OS=Homo sapiens GN=OAF PE=2 SV=1 - [OAF_HUMAN] | Out at first protein homolog | 0.982 |
| 395 | P58166 | Inhibin beta E chain OS=Homo sapiens GN=INHBE PE=1 SV=1 - [INHBE_HUMAN] | Inhibin beta E chain | 0.982 |
| 396 | P09211 | Glutathione S-transferase P OS=Homo sapiens GN=GSTP1 PE=1 SV=2 - [GSTP1_HUMAN] | Glutathione S-transferase P | 0.981 |
| 397 | Q13449 | Limbic system-associated membrane protein OS=Homo sapiens GN=LSAMP PE=1 SV=2 - [LSAMP_HUMAN] | Limbic system-associated membrane protein | 0.981 |
| 398 | P07477 | Trypsin-1 OS=Homo sapiens GN=PRSS1 PE=1 SV=1 - [TRY1_HUMAN] | Trypsin-1 | 0.980 |
| 399 | Q16610 | Extracellular matrix protein 1 OS=Homo sapiens GN=ECM1 PE=1 SV=2 - [ECM1_HUMAN] | Extracellular matrix protein 1 | 0.978 |
| 400 | Q9HBR0 | Putative sodium-coupled neutral amino acid transporter 10 OS=Homo sapiens GN=SLC38A10 PE=1 SV=2 - [S38AA_HUMAN] | Putative sodium-coupled neutral amino acid transporter 10 | 0.978 |
| 401 | Q15848 | Adiponectin OS=Homo sapiens GN=ADIPOQ PE=1 SV=1 - [ADIPO_HUMAN] | Adiponectin | 0.977 |
| 402 | P14151 | L-selectin OS=Homo sapiens GN=SELL PE=1 SV=2 - [LYAM1_HUMAN] | L-selectin | 0.977 |
| 403 | Q8WWA0 | Intelectin-1 OS=Homo sapiens GN=ITLN1 PE=1 SV=1 - [ITLN1_HUMAN] | Intelectin-1 | 0.974 |
| 404 | P00746 | Complement factor D OS=Homo sapiens GN=CFD PE=1 SV=5 - [CFAD_HUMAN] | Complement factor D | 0.973 |
| 405 | P12955 | Xaa-Pro dipeptidase OS=Homo sapiens GN=PEPD PE=1 SV=3 - [PEPD_HUMAN] | Xaa-Pro dipeptidase | 0.972 |
| 406 | P23083 | Immunoglobulin heavy variable 1-2 OS=Homo sapiens GN=IGHV1-2 PE=1 SV=2 - [HV102_HUMAN] | Immunoglobulin heavy variable 1-2 | 0.970 |
| 407 | Q96KN2 | Beta-Ala-His dipeptidase OS=Homo sapiens GN=CNDP1 PE=1 SV=4 - [CNDP1_HUMAN] | Beta-Ala-His dipeptidase | 0.970 |
| 408 | P08779 | Keratin, type I cytoskeletal 16 OS=Homo sapiens GN=KRT16 PE=1 SV=4 - [K1C16_HUMAN] | Keratin, type I cytoskeletal 16 | 0.969 |
| 409 | P01705 | Immunoglobulin lambda variable 2-23 OS=Homo sapiens GN=IGLV2-23 PE=1 SV=2 - [LV223_HUMAN] | Immunoglobulin lambda variable 2-23 | 0.968 |
| 410 | P13645 | Keratin, type I cytoskeletal 10 OS=Homo sapiens GN=KRT10 PE=1 SV=6 - [K1C10_HUMAN] | Keratin, type I cytoskeletal 10 | 0.965 |
| 411 | Q03591 | Complement factor H-related protein 1 OS=Homo sapiens GN=CFHR1 PE=1 SV=2 - [FHR1_HUMAN] | Complement factor H-related protein 1 | 0.965 |
| 412 | P81605 | Dermcidin OS=Homo sapiens GN=DCD PE=1 SV=2 - [DCD_HUMAN] | Dermcidin | 0.964 |
| 413 | Q13093 | Platelet-activating factor acetylhydrolase OS=Homo sapiens GN=PLA2G7 PE=1 SV=1 - [PAFA_HUMAN] | Platelet-activating factor acetylhydrolase | 0.962 |
| 414 | Q02487 | Desmocollin-2 OS=Homo sapiens GN=DSC2 PE=1 SV=1 - [DSC2_HUMAN] | Desmocollin-2 | 0.961 |
| 415 | P51884 | Lumican OS=Homo sapiens GN=LUM PE=1 SV=2 - [LUM_HUMAN] | Lumican | 0.961 |
| 416 | P01814 | Immunoglobulin heavy variable 2-70 OS=Homo sapiens GN=IGHV2-70 PE=1 SV=2 - [HV270_HUMAN] | Immunoglobulin heavy variable 2-70 | 0.960 |
| 417 | Q76LX8 | A disintegrin and metalloproteinase with thrombospondin motifs 13 OS=Homo sapiens GN=ADAMTS13 PE=1 SV=1 - [ATS13_HUMAN] | A disintegrin and metalloproteinase with thrombospondin motifs 13 | 0.960 |
| 418 | P02042 | Hemoglobin subunit delta OS=Homo sapiens GN=HBD PE=1 SV=2 - [HBD_HUMAN] | Hemoglobin subunit delta | 0.959 |
| 419 | Q7Z7M0 | Multiple epidermal growth factor-like domains protein 8 OS=Homo sapiens GN=MEGF8 PE=1 SV=2 - [MEGF8_HUMAN] | Multiple epidermal growth factor-like domains protein 8 | 0.957 |
| 420 | P49747 | Cartilage oligomeric matrix protein OS=Homo sapiens GN=COMP PE=1 SV=2 - [COMP_HUMAN] | Cartilage oligomeric matrix protein | 0.956 |
| 421 | P10721 | Mast/stem cell growth factor receptor Kit OS=Homo sapiens GN=KIT PE=1 SV=1 - [KIT_HUMAN] | Mast/stem cell growth factor receptor Kit | 0.956 |
| 422 | P13796 | Plastin-2 OS=Homo sapiens GN=LCP1 PE=1 SV=6 - [PLSL_HUMAN] | Plastin-2 | 0.955 |
| 423 | Q08188 | Protein-glutamine gamma-glutamyltransferase E OS=Homo sapiens GN=TGM3 PE=1 SV=4 - [TGM3_HUMAN] | Protein-glutamine gamma-glutamyltransferase E | 0.955 |
| 424 | Q5D862 | Filaggrin-2 OS=Homo sapiens GN=FLG2 PE=1 SV=1 - [FILA2_HUMAN] | Filaggrin-2 | 0.953 |
| 425 | O75382 | Tripartite motif-containing protein 3 OS=Homo sapiens GN=TRIM3 PE=1 SV=2 - [TRIM3_HUMAN] | Tripartite motif-containing protein 3 | 0.952 |
| 426 | Q92496 | Complement factor H-related protein 4 OS=Homo sapiens GN=CFHR4 PE=1 SV=3 - [FHR4_HUMAN] | Complement factor H-related protein 4 | 0.952 |
| 427 | Q6UX71 | Plexin domain-containing protein 2 OS=Homo sapiens GN=PLXDC2 PE=1 SV=1 - [PXDC2_HUMAN] | Plexin domain-containing protein 2 | 0.952 |
| 428 | Q9BUN1 | Protein MENT OS=Homo sapiens GN=MENT PE=2 SV=1 - [MENT_HUMAN] | Protein MENT | 0.950 |
| 429 | P30531 | Sodium- and chloride-dependent GABA transporter 1 OS=Homo sapiens GN=SLC6A1 PE=1 SV=2 - [SC6A1_HUMAN] | Sodium- and chloride-dependent GABA transporter 1 | 0.950 |
| 430 | P08195 | 4F2 cell-surface antigen heavy chain OS=Homo sapiens GN=SLC3A2 PE=1 SV=3 - [4F2_HUMAN] | 4F2 cell-surface antigen heavy chain | 0.949 |
| 431 | O75636 | Ficolin-3 OS=Homo sapiens GN=FCN3 PE=1 SV=2 - [FCN3_HUMAN] | Ficolin-3 | 0.949 |
| 432 | Q86VB7 | Scavenger receptor cysteine-rich type 1 protein M130 OS=Homo sapiens GN=CD163 PE=1 SV=2 - [C163A_HUMAN] | Scavenger receptor cysteine-rich type 1 protein M130 | 0.949 |
| 433 | P23470 | Receptor-type tyrosine-protein phosphatase gamma OS=Homo sapiens GN=PTPRG PE=1 SV=4 - [PTPRG_HUMAN] | Receptor-type tyrosine-protein phosphatase gamma | 0.948 |
| 434 | P15814 | Immunoglobulin lambda-like polypeptide 1 OS=Homo sapiens GN=IGLL1 PE=1 SV=1 - [IGLL1_HUMAN] | Immunoglobulin lambda-like polypeptide 1 | 0.947 |
| 435 | O15020 | Spectrin beta chain, non-erythrocytic 2 OS=Homo sapiens GN=SPTBN2 PE=1 SV=3 - [SPTN2_HUMAN] | Spectrin beta chain, non-erythrocytic 2 | 0.947 |
| 436 | A0A0C4DH25 | Immunoglobulin kappa variable 3-20 OS=Homo sapiens GN=IGKV3D-20 PE=3 SV=1 - [KVD20_HUMAN] | Immunoglobulin kappa variable 3-20 | 0.947 |
| 437 | A0A0C4DH31 | Immunoglobulin heavy variable 1-18 OS=Homo sapiens GN=IGHV1-18 PE=3 SV=1 - [HV118_HUMAN] | Immunoglobulin heavy variable 1-18 | 0.946 |
| 438 | P26927 | Hepatocyte growth factor-like protein OS=Homo sapiens GN=MST1 PE=1 SV=2 - [HGFL_HUMAN] | Hepatocyte growth factor-like protein | 0.944 |
| 439 | Q86UX7 | Fermitin family homolog 3 OS=Homo sapiens GN=FERMT3 PE=1 SV=1 - [URP2_HUMAN] | Fermitin family homolog 3 | 0.943 |
| 440 | P01591 | Immunoglobulin J chain OS=Homo sapiens GN=JCHAIN PE=1 SV=4 - [IGJ_HUMAN] | Immunoglobulin J chain | 0.942 |
| 441 | Q13332 | Receptor-type tyrosine-protein phosphatase S OS=Homo sapiens GN=PTPRS PE=1 SV=3 - [PTPRS_HUMAN] | Receptor-type tyrosine-protein phosphatase S | 0.941 |
| 442 | P58335 | Anthrax toxin receptor 2 OS=Homo sapiens GN=ANTXR2 PE=1 SV=5 - [ANTR2_HUMAN] | Anthrax toxin receptor 2 | 0.941 |
| 443 | P48741 | Putative heat shock 70 kDa protein 7 OS=Homo sapiens GN=HSPA7 PE=5 SV=2 - [HSP77_HUMAN] | Putative heat shock 70 kDa protein 7 | 0.940 |
| 444 | A0A075B6I1 | Immunoglobulin lambda variable 4-60 OS=Homo sapiens GN=IGLV4-60 PE=3 SV=1 - [LV460_HUMAN] | Immunoglobulin lambda variable 4-60 | 0.939 |
| 445 | P07357 | Complement component C8 alpha chain OS=Homo sapiens GN=C8A PE=1 SV=2 - [CO8A_HUMAN] | Complement component C8 alpha chain | 0.939 |
| 446 | A0A0C4DH24 | Immunoglobulin kappa variable 6-21 OS=Homo sapiens GN=IGKV6-21 PE=3 SV=1 - [KV621_HUMAN] | Immunoglobulin kappa variable 6-21 | 0.938 |
| 447 | Q6VUC0 | Transcription factor AP-2-epsilon OS=Homo sapiens GN=TFAP2E PE=2 SV=1 - [AP2E_HUMAN] | Transcription factor AP-2-epsilon | 0.937 |
| 448 | P24752 | Acetyl-CoA acetyltransferase, mitochondrial OS=Homo sapiens GN=ACAT1 PE=1 SV=1 - [THIL_HUMAN] | Acetyl-CoA acetyltransferase, mitochondrial | 0.937 |
| 449 | Q9ULI3 | Protein HEG homolog 1 OS=Homo sapiens GN=HEG1 PE=1 SV=3 - [HEG1_HUMAN] | Protein HEG homolog 1 | 0.936 |
| 450 | P01742 | Immunoglobulin heavy variable 1-69 OS=Homo sapiens GN=IGHV1-69 PE=1 SV=2 - [HV169_HUMAN] | Immunoglobulin heavy variable 1-69 | 0.935 |
| 451 | A0A0C4DH67 | Immunoglobulin kappa variable 1-8 OS=Homo sapiens GN=IGKV1-8 PE=3 SV=1 - [KV108_HUMAN] | Immunoglobulin kappa variable 1-8 | 0.935 |
| 452 | P06276 | Cholinesterase OS=Homo sapiens GN=BCHE PE=1 SV=1 - [CHLE_HUMAN] | Cholinesterase | 0.935 |
| 453 | Q9Y6R7 | IgGFc-binding protein OS=Homo sapiens GN=FCGBP PE=1 SV=3 - [FCGBP_HUMAN] | IgGFc-binding protein | 0.934 |
| 454 | Q9NPH3 | Interleukin-1 receptor accessory protein OS=Homo sapiens GN=IL1RAP PE=1 SV=2 - [IL1AP_HUMAN] | Interleukin-1 receptor accessory protein | 0.934 |
| 455 | P35443 | Thrombospondin-4 OS=Homo sapiens GN=THBS4 PE=1 SV=2 - [TSP4_HUMAN] | Thrombospondin-4 | 0.934 |
| 456 | Q9UHG3 | Prenylcysteine oxidase 1 OS=Homo sapiens GN=PCYOX1 PE=1 SV=3 - [PCYOX_HUMAN] | Prenylcysteine oxidase 1 | 0.934 |
| 457 | P05164 | Myeloperoxidase OS=Homo sapiens GN=MPO PE=1 SV=1 - [PERM_HUMAN] | Myeloperoxidase | 0.934 |
| 458 | O00533 | Neural cell adhesion molecule L1-like protein OS=Homo sapiens GN=CHL1 PE=1 SV=4 - [NCHL1_HUMAN] | Neural cell adhesion molecule L1-like protein | 0.934 |
| 459 | Q8TC99 | Fibronectin type III domain-containing protein 8 OS=Homo sapiens GN=FNDC8 PE=2 SV=2 - [FNDC8_HUMAN] | Fibronectin type III domain-containing protein 8 | 0.934 |
| 460 | A0M8Q6 | Ig lambda-7 chain C region OS=Homo sapiens GN=IGLC7 PE=4 SV=2 - [LAC7_HUMAN] | Ig lambda-7 chain C region | 0.934 |
| 461 | P01619 | Immunoglobulin kappa variable 3-20 OS=Homo sapiens GN=IGKV3-20 PE=1 SV=2 - [KV320_HUMAN] | Immunoglobulin kappa variable 3-20 | 0.931 |
| 462 | P01700 | Immunoglobulin lambda variable 1-47 OS=Homo sapiens GN=IGLV1-47 PE=1 SV=2 - [LV147_HUMAN] | Immunoglobulin lambda variable 1-47 | 0.930 |
| 463 | P02750 | Leucine-rich alpha-2-glycoprotein OS=Homo sapiens GN=LRG1 PE=1 SV=2 - [A2GL_HUMAN] | Leucine-rich alpha-2-glycoprotein | 0.930 |
| 464 | Q14126 | Desmoglein-2 OS=Homo sapiens GN=DSG2 PE=1 SV=2 - [DSG2_HUMAN] | Desmoglein-2 | 0.929 |
| 465 | P27487 | Dipeptidyl peptidase 4 OS=Homo sapiens GN=DPP4 PE=1 SV=2 - [DPP4_HUMAN] | Dipeptidyl peptidase 4 | 0.928 |
| 466 | Q99784 | Noelin OS=Homo sapiens GN=OLFM1 PE=1 SV=4 - [NOE1_HUMAN] | Noelin | 0.928 |
| 467 | Q8TC20 | Cancer-associated gene 1 protein OS=Homo sapiens GN=CAGE1 PE=1 SV=2 - [CAGE1_HUMAN] | Cancer-associated gene 1 protein | 0.928 |
| 468 | Q7Z794 | Keratin, type II cytoskeletal 1b OS=Homo sapiens GN=KRT77 PE=2 SV=3 - [K2C1B_HUMAN] | Keratin, type II cytoskeletal 1b | 0.928 |
| 469 | A0A0B4J1X8 | Immunoglobulin heavy variable 3-43 OS=Homo sapiens GN=IGHV3-43 PE=3 SV=1 - [HV343_HUMAN] | Immunoglobulin heavy variable 3-43 | 0.928 |
| 470 | P13598 | Intercellular adhesion molecule 2 OS=Homo sapiens GN=ICAM2 PE=1 SV=2 - [ICAM2_HUMAN] | Intercellular adhesion molecule 2 | 0.927 |
| 471 | P06310 | Immunoglobulin kappa variable 2-30 OS=Homo sapiens GN=IGKV2-30 PE=3 SV=2 - [KV230_HUMAN] | Immunoglobulin kappa variable 2-30 | 0.927 |
| 472 | P01860 | Ig gamma-3 chain C region OS=Homo sapiens GN=IGHG3 PE=1 SV=2 - [IGHG3_HUMAN] | Ig gamma-3 chain C region | 0.927 |
| 473 | A0A0C4DH38 | Immunoglobulin heavy variable 5-51 OS=Homo sapiens GN=IGHV5-51 PE=3 SV=1 - [HV551_HUMAN] | Immunoglobulin heavy variable 5-51 | 0.927 |
| 474 | P27918 | Properdin OS=Homo sapiens GN=CFP PE=1 SV=2 - [PROP_HUMAN] | Properdin | 0.926 |
| 475 | A0A0C4DH72 | Immunoglobulin kappa variable 1-6 OS=Homo sapiens GN=IGKV1-6 PE=3 SV=1 - [KV106_HUMAN] | Immunoglobulin kappa variable 1-6 | 0.926 |
| 476 | P01624 | Immunoglobulin kappa variable 3-15 OS=Homo sapiens GN=IGKV3-15 PE=1 SV=2 - [KV315_HUMAN] | Immunoglobulin kappa variable 3-15 | 0.925 |
| 477 | A0A075B6K2 | Immunoglobulin lambda variable 3-12 OS=Homo sapiens GN=IGLV3-12 PE=3 SV=2 - [LV312_HUMAN] | Immunoglobulin lambda variable 3-12 | 0.924 |
| 478 | P07360 | Complement component C8 gamma chain OS=Homo sapiens GN=C8G PE=1 SV=3 - [CO8G_HUMAN] | Complement component C8 gamma chain | 0.924 |
| 479 | P43251 | Biotinidase OS=Homo sapiens GN=BTD PE=1 SV=2 - [BTD_HUMAN] | Biotinidase | 0.924 |
| 480 | P80748 | Immunoglobulin lambda variable 3-21 OS=Homo sapiens GN=IGLV3-21 PE=1 SV=2 - [LV321_HUMAN] | Immunoglobulin lambda variable 3-21 | 0.924 |
| 481 | Q8NHQ9 | ATP-dependent RNA helicase DDX55 OS=Homo sapiens GN=DDX55 PE=1 SV=3 - [DDX55_HUMAN] | ATP-dependent RNA helicase DDX55 | 0.923 |
| 482 | P01766 | Immunoglobulin heavy variable 3-13 OS=Homo sapiens GN=IGHV3-13 PE=1 SV=2 - [HV313_HUMAN] | Immunoglobulin heavy variable 3-13 | 0.923 |
| 483 | P01721 | Immunoglobulin lambda variable 6-57 OS=Homo sapiens GN=IGLV6-57 PE=1 SV=2 - [LV657_HUMAN] | Immunoglobulin lambda variable 6-57 | 0.923 |
| 484 | A0A0B4J1V6 | Immunoglobulin heavy variable 3-73 OS=Homo sapiens GN=IGHV3-73 PE=3 SV=1 - [HV373_HUMAN] | Immunoglobulin heavy variable 3-73 | 0.922 |
| 485 | P02786 | Transferrin receptor protein 1 OS=Homo sapiens GN=TFRC PE=1 SV=2 - [TFR1_HUMAN] | Transferrin receptor protein 1 | 0.921 |
| 486 | A0A075B6H9 | Immunoglobulin lambda variable 4-69 OS=Homo sapiens GN=IGLV4-69 PE=1 SV=1 - [LV469_HUMAN] | Immunoglobulin lambda variable 4-69 | 0.921 |
| 487 | P22352 | Glutathione peroxidase 3 OS=Homo sapiens GN=GPX3 PE=1 SV=2 - [GPX3_HUMAN] | Glutathione peroxidase 3 | 0.921 |
| 488 | P35858 | Insulin-like growth factor-binding protein complex acid labile subunit OS=Homo sapiens GN=IGFALS PE=1 SV=1 - [ALS_HUMAN] | Insulin-like growth factor-binding protein complex acid labile subunit | 0.920 |
| 489 | P08294 | Extracellular superoxide dismutase [Cu-Zn] OS=Homo sapiens GN=SOD3 PE=1 SV=2 - [SODE_HUMAN] | Extracellular superoxide dismutase [Cu-Zn] | 0.920 |
| 490 | Q9HBB8 | Cadherin-related family member 5 OS=Homo sapiens GN=CDHR5 PE=1 SV=3 - [CDHR5_HUMAN] | Cadherin-related family member 5 | 0.920 |
| 491 | Q9UNW1 | Multiple inositol polyphosphate phosphatase 1 OS=Homo sapiens GN=MINPP1 PE=1 SV=1 - [MINP1_HUMAN] | Multiple inositol polyphosphate phosphatase 1 | 0.920 |
| 492 | P04278 | Sex hormone-binding globulin OS=Homo sapiens GN=SHBG PE=1 SV=2 - [SHBG_HUMAN] | Sex hormone-binding globulin | 0.920 |
| 493 | P01782 | Immunoglobulin heavy variable 3-9 OS=Homo sapiens GN=IGHV3-9 PE=1 SV=2 - [HV309_HUMAN] | Immunoglobulin heavy variable 3-9 | 0.920 |
| 494 | P32119 | Peroxiredoxin-2 OS=Homo sapiens GN=PRDX2 PE=1 SV=5 - [PRDX2_HUMAN] | Peroxiredoxin-2 | 0.920 |
| 495 | Q6UY14 | ADAMTS-like protein 4 OS=Homo sapiens GN=ADAMTSL4 PE=1 SV=2 - [ATL4_HUMAN] | ADAMTS-like protein 4 | 0.920 |
| 496 | Q8TAQ9 | SUN domain-containing protein 3 OS=Homo sapiens GN=SUN3 PE=1 SV=4 - [SUN3_HUMAN] | SUN domain-containing protein 3 | 0.919 |
| 497 | P02760 | Protein AMBP OS=Homo sapiens GN=AMBP PE=1 SV=1 - [AMBP_HUMAN] | Protein AMBP | 0.919 |
| 498 | P29622 | Kallistatin OS=Homo sapiens GN=SERPINA4 PE=1 SV=3 - [KAIN_HUMAN] | Kallistatin | 0.918 |
| 499 | A0A0B4J1X5 | Immunoglobulin heavy variable 3-74 OS=Homo sapiens GN=IGHV3-74 PE=3 SV=1 - [HV374_HUMAN] | Immunoglobulin heavy variable 3-74 | 0.918 |
| 500 | Q8TEQ8 | GPI ethanolamine phosphate transferase 3 OS=Homo sapiens GN=PIGO PE=1 SV=3 - [PIGO_HUMAN] | GPI ethanolamine phosphate transferase 3 | 0.917 |
| 501 | Q99996 | A-kinase anchor protein 9 OS=Homo sapiens GN=AKAP9 PE=1 SV=3 - [AKAP9_HUMAN] | A-kinase anchor protein 9 | 0.917 |
| 502 | Q7L8J4 | SH3 domain-binding protein 5-like OS=Homo sapiens GN=SH3BP5L PE=1 SV=1 - [3BP5L_HUMAN] | SH3 domain-binding protein 5-like | 0.916 |
| 503 | Q8TDL5 | BPI fold-containing family B member 1 OS=Homo sapiens GN=BPIFB1 PE=1 SV=1 - [BPIB1_HUMAN] | BPI fold-containing family B member 1 | 0.916 |
| 504 | P01594 | Immunoglobulin kappa variable 1-33 OS=Homo sapiens GN=IGKV1-33 PE=1 SV=2 - [KV133_HUMAN] | Immunoglobulin kappa variable 1-33 | 0.915 |
| 505 | P04180 | Phosphatidylcholine-sterol acyltransferase OS=Homo sapiens GN=LCAT PE=1 SV=1 - [LCAT_HUMAN] | Phosphatidylcholine-sterol acyltransferase | 0.915 |
| 506 | A0A075B6K0 | Immunoglobulin lambda variable 3-16 OS=Homo sapiens GN=IGLV3-16 PE=3 SV=2 - [LV316_HUMAN] | Immunoglobulin lambda variable 3-16 | 0.915 |
| 507 | A0A075B6J9 | Immunoglobulin lambda variable 2-18 OS=Homo sapiens GN=IGLV2-18 PE=3 SV=2 - [LV218_HUMAN] | Immunoglobulin lambda variable 2-18 | 0.914 |
| 508 | P33151 | Cadherin-5 OS=Homo sapiens GN=CDH5 PE=1 SV=5 - [CADH5_HUMAN] | Cadherin-5 | 0.914 |
| 509 | Q92823 | Neuronal cell adhesion molecule OS=Homo sapiens GN=NRCAM PE=1 SV=3 - [NRCAM_HUMAN] | Neuronal cell adhesion molecule | 0.914 |
| 510 | A0A087WW87 | Immunoglobulin kappa variable 2-40 OS=Homo sapiens GN=IGKV2-40 PE=3 SV=2 - [KV240_HUMAN] | Immunoglobulin kappa variable 2-40 | 0.914 |
| 511 | P69891 | Hemoglobin subunit gamma-1 OS=Homo sapiens GN=HBG1 PE=1 SV=2 - [HBG1_HUMAN] | Hemoglobin subunit gamma-1 | 0.914 |
| 512 | A0A0A0MRZ8 | Immunoglobulin kappa variable 3D-11 OS=Homo sapiens GN=IGKV3D-11 PE=3 SV=6 - [KVD11_HUMAN] | Immunoglobulin kappa variable 3D-11 | 0.913 |
| 513 | P01877 | Ig alpha-2 chain C region OS=Homo sapiens GN=IGHA2 PE=1 SV=3 - [IGHA2_HUMAN] | Ig alpha-2 chain C region | 0.913 |
| 514 | P01602 | Immunoglobulin kappa variable 1-5 OS=Homo sapiens GN=IGKV1-5 PE=1 SV=2 - [KV105_HUMAN] | Immunoglobulin kappa variable 1-5 | 0.913 |
| 515 | P09172 | Dopamine beta-hydroxylase OS=Homo sapiens GN=DBH PE=1 SV=3 - [DOPO_HUMAN] | Dopamine beta-hydroxylase | 0.913 |
| 516 | P55058 | Phospholipid transfer protein OS=Homo sapiens GN=PLTP PE=1 SV=1 - [PLTP_HUMAN] | Phospholipid transfer protein | 0.912 |
| 517 | P01861 | Ig gamma-4 chain C region OS=Homo sapiens GN=IGHG4 PE=1 SV=1 - [IGHG4_HUMAN] | Ig gamma-4 chain C region | 0.912 |
| 518 | P01008 | Antithrombin-III OS=Homo sapiens GN=SERPINC1 PE=1 SV=1 - [ANT3_HUMAN] | Antithrombin-III | 0.912 |
| 519 | Q04756 | Hepatocyte growth factor activator OS=Homo sapiens GN=HGFAC PE=1 SV=1 - [HGFA_HUMAN] | Hepatocyte growth factor activator | 0.911 |
| 520 | O43866 | CD5 antigen-like OS=Homo sapiens GN=CD5L PE=1 SV=1 - [CD5L_HUMAN] | CD5 antigen-like | 0.910 |
| 521 | P00915 | Carbonic anhydrase 1 OS=Homo sapiens GN=CA1 PE=1 SV=2 - [CAH1_HUMAN] | Carbonic anhydrase 1 | 0.910 |
| 522 | P01780 | Immunoglobulin heavy variable 3-7 OS=Homo sapiens GN=IGHV3-7 PE=1 SV=2 - [HV307_HUMAN] | Immunoglobulin heavy variable 3-7 | 0.909 |
| 523 | P02741 | C-reactive protein OS=Homo sapiens GN=CRP PE=1 SV=1 - [CRP_HUMAN] | C-reactive protein | 0.908 |
| 524 | P05160 | Coagulation factor XIII B chain OS=Homo sapiens GN=F13B PE=1 SV=3 - [F13B_HUMAN] | Coagulation factor XIII B chain | 0.908 |
| 525 | Q9UGM5 | Fetuin-B OS=Homo sapiens GN=FETUB PE=1 SV=2 - [FETUB_HUMAN] | Fetuin-B | 0.907 |
| 526 | P16930 | Fumarylacetoacetase OS=Homo sapiens GN=FAH PE=1 SV=2 - [FAAA_HUMAN] | Fumarylacetoacetase | 0.906 |
| 527 | P08185 | Corticosteroid-binding globulin OS=Homo sapiens GN=SERPINA6 PE=1 SV=1 - [CBG_HUMAN] | Corticosteroid-binding globulin | 0.906 |
| 528 | Q8TAT6 | Nuclear protein localization protein 4 homolog OS=Homo sapiens GN=NPLOC4 PE=1 SV=3 - [NPL4_HUMAN] | Nuclear protein localization protein 4 homolog | 0.905 |
| 529 | P02753 | Retinol-binding protein 4 OS=Homo sapiens GN=RBP4 PE=1 SV=3 - [RET4_HUMAN] | Retinol-binding protein 4 | 0.905 |
| 530 | P08709 | Coagulation factor VII OS=Homo sapiens GN=F7 PE=1 SV=1 - [FA7_HUMAN] | Coagulation factor VII | 0.905 |
| 531 | P22105 | Tenascin-X OS=Homo sapiens GN=TNXB PE=1 SV=4 - [TENX_HUMAN] | Tenascin-X | 0.905 |
| 532 | P00738 | Haptoglobin OS=Homo sapiens GN=HP PE=1 SV=1 - [HPT_HUMAN] | Haptoglobin | 0.905 |
| 533 | P68871 | Hemoglobin subunit beta OS=Homo sapiens GN=HBB PE=1 SV=2 - [HBB_HUMAN] | Hemoglobin subunit beta | 0.905 |
| 534 | P01009 | Alpha-1-antitrypsin OS=Homo sapiens GN=SERPINA1 PE=1 SV=3 - [A1AT_HUMAN] | Alpha-1-antitrypsin | 0.904 |
| 535 | Q8N4Q0 | Prostaglandin reductase 3 OS=Homo sapiens GN=ZADH2 PE=1 SV=1 - [PTGR3_HUMAN] | Prostaglandin reductase 3 | 0.904 |
| 536 | P08519 | Apolipoprotein(a) OS=Homo sapiens GN=LPA PE=1 SV=1 - [APOA_HUMAN] | Apolipoprotein(a | 0.904 |
| 537 | P01011 | Alpha-1-antichymotrypsin OS=Homo sapiens GN=SERPINA3 PE=1 SV=2 - [AACT_HUMAN] | Alpha-1-antichymotrypsin | 0.904 |
| 538 | A1L4H1 | Soluble scavenger receptor cysteine-rich domain-containing protein SSC5D OS=Homo sapiens GN=SSC5D PE=1 SV=3 - [SRCRL_HUMAN] | Soluble scavenger receptor cysteine-rich domain-containing protein SSC5D | 0.903 |
| 539 | P36955 | Pigment epithelium-derived factor OS=Homo sapiens GN=SERPINF1 PE=1 SV=4 - [PEDF_HUMAN] | Pigment epithelium-derived factor | 0.903 |
| 540 | P02647 | Apolipoprotein A-I OS=Homo sapiens GN=APOA1 PE=1 SV=1 - [APOA1_HUMAN] | Apolipoprotein A-I | 0.902 |
| 541 | A0A075B6J1 | Immunoglobulin lambda variable 5-37 OS=Homo sapiens GN=IGLV5-37 PE=3 SV=1 - [LV537_HUMAN] | Immunoglobulin lambda variable 5-37 | 0.902 |
| 542 | P07738 | Bisphosphoglycerate mutase OS=Homo sapiens GN=BPGM PE=1 SV=2 - [PMGE_HUMAN] | Bisphosphoglycerate mutase | 0.901 |
| 543 | Q9UIL4 | Kinesin-like protein KIF25 OS=Homo sapiens GN=KIF25 PE=2 SV=2 - [KIF25_HUMAN] | Kinesin-like protein KIF25 | 0.900 |
| 544 | Q32MQ0 | Zinc finger protein 750 OS=Homo sapiens GN=ZNF750 PE=1 SV=1 - [ZN750_HUMAN] | Zinc finger protein 750 | 0.899 |
| 545 | P03950 | Angiogenin OS=Homo sapiens GN=ANG PE=1 SV=1 - [ANGI_HUMAN] | Angiogenin | 0.898 |
| 546 | P42338 | Phosphatidylinositol 4,5-bisphosphate 3-kinase catalytic subunit beta isoform OS=Homo sapiens GN=PIK3CB PE=1 SV=1 - [PK3CB_HUMAN] | Phosphatidylinositol 4,5-bisphosphate 3-kinase catalytic subunit beta isoform | 0.898 |
| 547 | P01857 | Ig gamma-1 chain C region OS=Homo sapiens GN=IGHG1 PE=1 SV=1 - [IGHG1_HUMAN] | Ig gamma-1 chain C region | 0.897 |
| 548 | Q9NZK5 | Adenosine deaminase CECR1 OS=Homo sapiens GN=CECR1 PE=1 SV=2 - [CECR1_HUMAN] | Adenosine deaminase CECR1 | 0.897 |
| 549 | P02766 | Transthyretin OS=Homo sapiens GN=TTR PE=1 SV=1 - [TTHY_HUMAN] | Transthyretin | 0.897 |
| 550 | P05452 | Tetranectin OS=Homo sapiens GN=CLEC3B PE=1 SV=3 - [TETN_HUMAN] | Tetranectin | 0.897 |
| 551 | P12830 | Cadherin-1 OS=Homo sapiens GN=CDH1 PE=1 SV=3 - [CADH1_HUMAN] | Cadherin-1 | 0.896 |
| 552 | P19827 | Inter-alpha-trypsin inhibitor heavy chain H1 OS=Homo sapiens GN=ITIH1 PE=1 SV=3 - [ITIH1_HUMAN] | Inter-alpha-trypsin inhibitor heavy chain H1 | 0.896 |
| 553 | P01040 | Cystatin-A OS=Homo sapiens GN=CSTA PE=1 SV=1 - [CYTA_HUMAN] | Cystatin-A | 0.896 |
| 554 | A0A075B6S2 | Immunoglobulin kappa variable 2D-29 OS=Homo sapiens GN=IGKV2D-29 PE=3 SV=1 - [KVD29_HUMAN] | Immunoglobulin kappa variable 2D-29 | 0.896 |
| 555 | A0A075B6K4 | Immunoglobulin lambda variable 3-10 OS=Homo sapiens GN=IGLV3-10 PE=3 SV=2 - [LV310_HUMAN] | Immunoglobulin lambda variable 3-10 | 0.896 |
| 556 | P04217 | Alpha-1B-glycoprotein OS=Homo sapiens GN=A1BG PE=1 SV=4 - [A1BG_HUMAN] | Alpha-1B-glycoprotein | 0.895 |
| 557 | P00748 | Coagulation factor XII OS=Homo sapiens GN=F12 PE=1 SV=3 - [FA12_HUMAN] | Coagulation factor XII | 0.895 |
| 558 | P08603 | Complement factor H OS=Homo sapiens GN=CFH PE=1 SV=4 - [CFAH_HUMAN] | Complement factor H | 0.895 |
| 559 | P00918 | Carbonic anhydrase 2 OS=Homo sapiens GN=CA2 PE=1 SV=2 - [CAH2_HUMAN] | Carbonic anhydrase 2 | 0.895 |
| 560 | P01859 | Ig gamma-2 chain C region OS=Homo sapiens GN=IGHG2 PE=1 SV=2 - [IGHG2_HUMAN] | Ig gamma-2 chain C region | 0.895 |
| 561 | P54108 | Cysteine-rich secretory protein 3 OS=Homo sapiens GN=CRISP3 PE=1 SV=1 - [CRIS3_HUMAN] | Cysteine-rich secretory protein 3 | 0.894 |
| 562 | P22792 | Carboxypeptidase N subunit 2 OS=Homo sapiens GN=CPN2 PE=1 SV=3 - [CPN2_HUMAN] | Carboxypeptidase N subunit 2 | 0.894 |
| 563 | P02788 | Lactotransferrin OS=Homo sapiens GN=LTF PE=1 SV=6 - [TRFL_HUMAN] | Lactotransferrin | 0.894 |
| 564 | P01764 | Immunoglobulin heavy variable 3-23 OS=Homo sapiens GN=IGHV3-23 PE=1 SV=2 - [HV323_HUMAN] | Immunoglobulin heavy variable 3-23 | 0.894 |
| 565 | P02765 | Alpha-2-HS-glycoprotein OS=Homo sapiens GN=AHSG PE=1 SV=1 - [FETUA_HUMAN] | Alpha-2-HS-glycoprotein | 0.894 |
| 566 | Q8IZF2 | Adhesion G protein-coupled receptor F5 OS=Homo sapiens GN=ADGRF5 PE=1 SV=3 - [AGRF5_HUMAN] | Adhesion G protein-coupled receptor F5 | 0.894 |
| 567 | A0A087WSY6 | Immunoglobulin kappa variable 3D-15 OS=Homo sapiens GN=IGKV3D-15 PE=3 SV=6 - [KVD15_HUMAN] | Immunoglobulin kappa variable 3D-15 | 0.893 |
| 568 | Q6E0U4 | Dermokine OS=Homo sapiens GN=DMKN PE=1 SV=3 - [DMKN_HUMAN] | Dermokine | 0.893 |
| 569 | Q9HDC9 | Adipocyte plasma membrane-associated protein OS=Homo sapiens GN=APMAP PE=1 SV=2 - [APMAP_HUMAN] | Adipocyte plasma membrane-associated protein | 0.893 |
| 570 | Q9BXR6 | Complement factor H-related protein 5 OS=Homo sapiens GN=CFHR5 PE=1 SV=1 - [FHR5_HUMAN] | Complement factor H-related protein 5 | 0.893 |
| 571 | P07359 | Platelet glycoprotein Ib alpha chain OS=Homo sapiens GN=GP1BA PE=1 SV=2 - [GP1BA_HUMAN] | Platelet glycoprotein Ib alpha chain | 0.893 |
| 572 | P04211 | Immunoglobulin lambda variable 7-43 OS=Homo sapiens GN=IGLV7-43 PE=3 SV=2 - [LV743_HUMAN] | Immunoglobulin lambda variable 7-43 | 0.892 |
| 573 | P15169 | Carboxypeptidase N catalytic chain OS=Homo sapiens GN=CPN1 PE=1 SV=1 - [CBPN_HUMAN] | Carboxypeptidase N catalytic chain | 0.892 |
| 574 | Q12794 | Hyaluronidase-1 OS=Homo sapiens GN=HYAL1 PE=1 SV=2 - [HYAL1_HUMAN] | Hyaluronidase-1 | 0.892 |
| 575 | P05543 | Thyroxine-binding globulin OS=Homo sapiens GN=SERPINA7 PE=1 SV=2 - [THBG_HUMAN] | Thyroxine-binding globulin | 0.892 |
| 576 | Q13395 | Probable methyltransferase TARBP1 OS=Homo sapiens GN=TARBP1 PE=1 SV=1 - [TARB1_HUMAN] | Probable methyltransferase TARBP1 | 0.892 |
| 577 | P00488 | Coagulation factor XIII A chain OS=Homo sapiens GN=F13A1 PE=1 SV=4 - [F13A_HUMAN] | Coagulation factor XIII A chain | 0.891 |
| 578 | P05155 | Plasma protease C1 inhibitor OS=Homo sapiens GN=SERPING1 PE=1 SV=2 - [IC1_HUMAN] | Plasma protease C1 inhibitor | 0.891 |
| 579 | P35590 | Tyrosine-protein kinase receptor Tie-1 OS=Homo sapiens GN=TIE1 PE=1 SV=1 - [TIE1_HUMAN] | Tyrosine-protein kinase receptor Tie-1 | 0.891 |
| 580 | A0A0B4J2D9 | Immunoglobulin kappa variable 1D-13 OS=Homo sapiens GN=IGKV1D-13 PE=3 SV=1 - [KVD13_HUMAN] | Immunoglobulin kappa variable 1D-13 | 0.891 |
| 581 | P02746 | Complement C1q subcomponent subunit B OS=Homo sapiens GN=C1QB PE=1 SV=3 - [C1QB_HUMAN] | Complement C1q subcomponent subunit B | 0.891 |
| 582 | P10909 | Clusterin OS=Homo sapiens GN=CLU PE=1 SV=1 - [CLUS_HUMAN] | Clusterin | 0.891 |
| 583 | P01024 | Complement C3 OS=Homo sapiens GN=C3 PE=1 SV=2 - [CO3_HUMAN] | Complement C3 | 0.890 |
| 584 | Q9H3R1 | Bifunctional heparan sulfate N-deacetylase/N-sulfotransferase 4 OS=Homo sapiens GN=NDST4 PE=2 SV=1 - [NDST4_HUMAN] | Bifunctional heparan sulfate N-deacetylase/N-sulfotransferase 4 | 0.890 |
| 585 | P00450 | Ceruloplasmin OS=Homo sapiens GN=CP PE=1 SV=1 - [CERU_HUMAN] | Ceruloplasmin | 0.889 |
| 586 | Q96PD5 | N-acetylmuramoyl-L-alanine amidase OS=Homo sapiens GN=PGLYRP2 PE=1 SV=1 - [PGRP2_HUMAN] | N-acetylmuramoyl-L-alanine amidase | 0.889 |
| 587 | P69905 | Hemoglobin subunit alpha OS=Homo sapiens GN=HBA1 PE=1 SV=2 - [HBA_HUMAN] | Hemoglobin subunit alpha | 0.888 |
| 588 | P06681 | Complement C2 OS=Homo sapiens GN=C2 PE=1 SV=2 - [CO2_HUMAN] | Complement C2 | 0.888 |
| 589 | O95445 | Apolipoprotein M OS=Homo sapiens GN=APOM PE=1 SV=2 - [APOM_HUMAN] | Apolipoprotein M | 0.888 |
| 590 | Q5JXB2 | Putative ubiquitin-conjugating enzyme E2 N-like OS=Homo sapiens GN=UBE2NL PE=1 SV=1 - [UE2NL_HUMAN] | Putative ubiquitin-conjugating enzyme E2 N-like | 0.887 |
| 591 | O75882 | Attractin OS=Homo sapiens GN=ATRN PE=1 SV=2 - [ATRN_HUMAN] | Attractin | 0.887 |
| 592 | O75356 | Ectonucleoside triphosphate diphosphohydrolase 5 OS=Homo sapiens GN=ENTPD5 PE=1 SV=1 - [ENTP5_HUMAN] | Ectonucleoside triphosphate diphosphohydrolase 5 | 0.887 |
| 593 | Q9NZP8 | Complement C1r subcomponent-like protein OS=Homo sapiens GN=C1RL PE=1 SV=2 - [C1RL_HUMAN] | Complement C1r subcomponent-like protein | 0.886 |
| 594 | Q15828 | Cystatin-M OS=Homo sapiens GN=CST6 PE=1 SV=1 - [CYTM_HUMAN] | Cystatin-M | 0.886 |
| 595 | A0A0B4J1V0 | Immunoglobulin heavy variable 3-15 OS=Homo sapiens GN=IGHV3-15 PE=3 SV=1 - [HV315_HUMAN] | Immunoglobulin heavy variable 3-15 | 0.886 |
| 596 | P02747 | Complement C1q subcomponent subunit C OS=Homo sapiens GN=C1QC PE=1 SV=3 - [C1QC_HUMAN] | Complement C1q subcomponent subunit C | 0.886 |
| 597 | B9A064 | Immunoglobulin lambda-like polypeptide 5 OS=Homo sapiens GN=IGLL5 PE=2 SV=2 - [IGLL5_HUMAN] | Immunoglobulin lambda-like polypeptide 5 | 0.885 |
| 598 | A0A0A0MS15 | Immunoglobulin heavy variable 3-49 OS=Homo sapiens GN=IGHV3-49 PE=1 SV=1 - [HV349_HUMAN] | Immunoglobulin heavy variable 3-49 | 0.885 |
| 599 | P27930 | Interleukin-1 receptor type 2 OS=Homo sapiens GN=IL1R2 PE=1 SV=1 - [IL1R2_HUMAN] | Interleukin-1 receptor type 2 | 0.885 |
| 600 | P04275 | von Willebrand factor OS=Homo sapiens GN=VWF PE=1 SV=4 - [VWF_HUMAN] | von Willebrand factor | 0.885 |
| 601 | P27169 | Serum paraoxonase/arylesterase 1 OS=Homo sapiens GN=PON1 PE=1 SV=3 - [PON1_HUMAN] | Serum paraoxonase/arylesterase 1 | 0.885 |
| 602 | P01019 | Angiotensinogen OS=Homo sapiens GN=AGT PE=1 SV=1 - [ANGT_HUMAN] | Angiotensinogen | 0.884 |
| 603 | P01876 | Ig alpha-1 chain C region OS=Homo sapiens GN=IGHA1 PE=1 SV=2 - [IGHA1_HUMAN] | Ig alpha-1 chain C region | 0.882 |
| 604 | O95998 | Interleukin-18-binding protein OS=Homo sapiens GN=IL18BP PE=1 SV=2 - [I18BP_HUMAN] | Interleukin-18-binding protein | 0.881 |
| 605 | P02787 | Serotransferrin OS=Homo sapiens GN=TF PE=1 SV=3 - [TRFE_HUMAN] | Serotransferrin | 0.880 |
| 606 | Q96IY4 | Carboxypeptidase B2 OS=Homo sapiens GN=CPB2 PE=1 SV=2 - [CBPB2_HUMAN] | Carboxypeptidase B2 | 0.879 |
| 607 | Q15485 | Ficolin-2 OS=Homo sapiens GN=FCN2 PE=1 SV=2 - [FCN2_HUMAN] | Ficolin-2 | 0.879 |
| 608 | Q9NY15 | Stabilin-1 OS=Homo sapiens GN=STAB1 PE=1 SV=3 - [STAB1_HUMAN] | Stabilin-1 | 0.879 |
| 609 | P43652 | Afamin OS=Homo sapiens GN=AFM PE=1 SV=1 - [AFAM_HUMAN] | Afamin | 0.879 |
| 610 | P00747 | Plasminogen OS=Homo sapiens GN=PLG PE=1 SV=2 - [PLMN_HUMAN] | Plasminogen | 0.879 |
| 611 | Q13103 | Secreted phosphoprotein 24 OS=Homo sapiens GN=SPP2 PE=1 SV=1 - [SPP24_HUMAN] | Secreted phosphoprotein 24 | 0.879 |
| 612 | A0A0C4DH34 | Immunoglobulin heavy variable 4-28 OS=Homo sapiens GN=IGHV4-28 PE=3 SV=1 - [HV428_HUMAN] | Immunoglobulin heavy variable 4-28 | 0.879 |
| 613 | P25311 | Zinc-alpha-2-glycoprotein OS=Homo sapiens GN=AZGP1 PE=1 SV=2 - [ZA2G_HUMAN] | Zinc-alpha-2-glycoprotein | 0.878 |
| 614 | P02790 | Hemopexin OS=Homo sapiens GN=HPX PE=1 SV=2 - [HEMO_HUMAN] | Hemopexin | 0.878 |
| 615 | P80108 | Phosphatidylinositol-glycan-specific phospholipase D OS=Homo sapiens GN=GPLD1 PE=1 SV=3 - [PHLD_HUMAN] | Phosphatidylinositol-glycan-specific phospholipase D | 0.878 |
| 616 | O95497 | Pantetheinase OS=Homo sapiens GN=VNN1 PE=1 SV=2 - [VNN1_HUMAN] | Pantetheinase | 0.877 |
| 617 | P02763 | Alpha-1-acid glycoprotein 1 OS=Homo sapiens GN=ORM1 PE=1 SV=1 - [A1AG1_HUMAN] | Alpha-1-acid glycoprotein 1 | 0.877 |
| 618 | Q15166 | Serum paraoxonase/lactonase 3 OS=Homo sapiens GN=PON3 PE=1 SV=3 - [PON3_HUMAN] | Serum paraoxonase/lactonase 3 | 0.877 |
| 619 | P00739 | Haptoglobin-related protein OS=Homo sapiens GN=HPR PE=2 SV=2 - [HPTR_HUMAN] | Haptoglobin-related protein | 0.876 |
| 620 | P05090 | Apolipoprotein D OS=Homo sapiens GN=APOD PE=1 SV=1 - [APOD_HUMAN] | Apolipoprotein D | 0.876 |
| 621 | A0A0B4J1Y9 | Immunoglobulin heavy variable 3-72 OS=Homo sapiens GN=IGHV3-72 PE=3 SV=1 - [HV372_HUMAN] | Immunoglobulin heavy variable 3-72 | 0.875 |
| 622 | A0A075B6I0 | Immunoglobulin lambda variable 8-61 OS=Homo sapiens GN=IGLV8-61 PE=3 SV=7 - [LV861_HUMAN] | Immunoglobulin lambda variable 8-61 | 0.875 |
| 623 | P01871 | Ig mu chain C region OS=Homo sapiens GN=IGHM PE=1 SV=3 - [IGHM_HUMAN] | Ig mu chain C region | 0.874 |
| 624 | P07358 | Complement component C8 beta chain OS=Homo sapiens GN=C8B PE=1 SV=3 - [CO8B_HUMAN] | Complement component C8 beta chain | 0.873 |
| 625 | P01023 | Alpha-2-macroglobulin OS=Homo sapiens GN=A2M PE=1 SV=3 - [A2MG_HUMAN] | Alpha-2-macroglobulin | 0.873 |
| 626 | Q14515 | SPARC-like protein 1 OS=Homo sapiens GN=SPARCL1 PE=1 SV=2 - [SPRL1_HUMAN] | SPARC-like protein 1 | 0.871 |
| 627 | P19823 | Inter-alpha-trypsin inhibitor heavy chain H2 OS=Homo sapiens GN=ITIH2 PE=1 SV=2 - [ITIH2_HUMAN] | Inter-alpha-trypsin inhibitor heavy chain H2 | 0.871 |
| 628 | P23142 | Fibulin-1 OS=Homo sapiens GN=FBLN1 PE=1 SV=4 - [FBLN1_HUMAN] | Fibulin-1 | 0.870 |
| 629 | P20742 | Pregnancy zone protein OS=Homo sapiens GN=PZP PE=1 SV=4 - [PZP_HUMAN] | Pregnancy zone protein | 0.870 |
| 630 | P10643 | Complement component C7 OS=Homo sapiens GN=C7 PE=1 SV=2 - [CO7_HUMAN] | Complement component C7 | 0.870 |
| 631 | Q06033 | Inter-alpha-trypsin inhibitor heavy chain H3 OS=Homo sapiens GN=ITIH3 PE=1 SV=2 - [ITIH3_HUMAN] | Inter-alpha-trypsin inhibitor heavy chain H3 | 0.870 |
| 632 | Q9NQ79 | Cartilage acidic protein 1 OS=Homo sapiens GN=CRTAC1 PE=1 SV=2 - [CRAC1_HUMAN] | Cartilage acidic protein 1 | 0.869 |
| 633 | P02768 | Serum albumin OS=Homo sapiens GN=ALB PE=1 SV=2 - [ALBU_HUMAN] | Serum albumin | 0.869 |
| 634 | P07225 | Vitamin K-dependent protein S OS=Homo sapiens GN=PROS1 PE=1 SV=1 - [PROS_HUMAN] | Vitamin K-dependent protein S | 0.868 |
| 635 | Q8IZJ1 | Netrin receptor UNC5B OS=Homo sapiens GN=UNC5B PE=1 SV=2 - [UNC5B_HUMAN] | Netrin receptor UNC5B | 0.868 |
| 636 | P01880 | Ig delta chain C region OS=Homo sapiens GN=IGHD PE=1 SV=2 - [IGHD_HUMAN] | Ig delta chain C region | 0.868 |
| 637 | P35542 | Serum amyloid A-4 protein OS=Homo sapiens GN=SAA4 PE=1 SV=2 - [SAA4_HUMAN] | Serum amyloid A-4 protein | 0.868 |
| 638 | P04196 | Histidine-rich glycoprotein OS=Homo sapiens GN=HRG PE=1 SV=1 - [HRG_HUMAN] | Histidine-rich glycoprotein | 0.868 |
| 639 | A0A0B4J1U7 | Immunoglobulin heavy variable 6-1 OS=Homo sapiens GN=IGHV6-1 PE=3 SV=1 - [HV601_HUMAN] | Immunoglobulin heavy variable 6-1 | 0.867 |
| 640 | P05156 | Complement factor I OS=Homo sapiens GN=CFI PE=1 SV=2 - [CFAI_HUMAN] | Complement factor I | 0.866 |
| 641 | P08571 | Monocyte differentiation antigen CD14 OS=Homo sapiens GN=CD14 PE=1 SV=2 - [CD14_HUMAN] | Monocyte differentiation antigen CD14 | 0.866 |
| 642 | P19652 | Alpha-1-acid glycoprotein 2 OS=Homo sapiens GN=ORM2 PE=1 SV=2 - [A1AG2_HUMAN] | Alpha-1-acid glycoprotein 2 | 0.866 |
| 643 | P13671 | Complement component C6 OS=Homo sapiens GN=C6 PE=1 SV=3 - [CO6_HUMAN] | Complement component C6 | 0.866 |
| 644 | P09871 | Complement C1s subcomponent OS=Homo sapiens GN=C1S PE=1 SV=1 - [C1S_HUMAN] | Complement C1s subcomponent | 0.866 |
| 645 | P11279 | Lysosome-associated membrane glycoprotein 1 OS=Homo sapiens GN=LAMP1 PE=1 SV=3 - [LAMP1_HUMAN] | Lysosome-associated membrane glycoprotein 1 | 0.865 |
| 646 | O14791 | Apolipoprotein L1 OS=Homo sapiens GN=APOL1 PE=1 SV=5 - [APOL1_HUMAN] | Apolipoprotein L1 | 0.865 |
| 647 | P01833 | Polymeric immunoglobulin receptor OS=Homo sapiens GN=PIGR PE=1 SV=4 - [PIGR_HUMAN] | Polymeric immunoglobulin receptor | 0.865 |
| 648 | P61626 | Lysozyme C OS=Homo sapiens GN=LYZ PE=1 SV=1 - [LYSC_HUMAN] | Lysozyme C | 0.864 |
| 649 | P08697 | Alpha-2-antiplasmin OS=Homo sapiens GN=SERPINF2 PE=1 SV=3 - [A2AP_HUMAN] | Alpha-2-antiplasmin | 0.864 |
| 650 | Q99969 | Retinoic acid receptor responder protein 2 OS=Homo sapiens GN=RARRES2 PE=1 SV=1 - [RARR2_HUMAN] | Retinoic acid receptor responder protein 2 | 0.864 |
| 651 | P22891 | Vitamin K-dependent protein Z OS=Homo sapiens GN=PROZ PE=1 SV=2 - [PROZ_HUMAN] | Vitamin K-dependent protein Z | 0.863 |
| 652 | Q13790 | Apolipoprotein F OS=Homo sapiens GN=APOF PE=1 SV=2 - [APOF_HUMAN] | Apolipoprotein F | 0.862 |
| 653 | P20851 | C4b-binding protein beta chain OS=Homo sapiens GN=C4BPB PE=1 SV=1 - [C4BPB_HUMAN] | C4b-binding protein beta chain | 0.861 |
| 654 | P01031 | Complement C5 OS=Homo sapiens GN=C5 PE=1 SV=4 - [CO5_HUMAN] | Complement C5 | 0.861 |
| 655 | O95477 | ATP-binding cassette sub-family A member 1 OS=Homo sapiens GN=ABCA1 PE=1 SV=3 - [ABCA1_HUMAN] | ATP-binding cassette sub-family A member 1 | 0.860 |
| 656 | P0CG05 | Ig lambda-2 chain C regions OS=Homo sapiens GN=IGLC2 PE=1 SV=1 - [LAC2_HUMAN] | Ig lambda-2 chain C regions | 0.860 |
| 657 | P02745 | Complement C1q subcomponent subunit A OS=Homo sapiens GN=C1QA PE=1 SV=2 - [C1QA_HUMAN] | Complement C1q subcomponent subunit A | 0.860 |
| 658 | P01718 | Immunoglobulin lambda variable 3-27 OS=Homo sapiens GN=IGLV3-27 PE=1 SV=2 - [LV327_HUMAN] | Immunoglobulin lambda variable 3-27 | 0.859 |
| 659 | P02144 | Myoglobin OS=Homo sapiens GN=MB PE=1 SV=2 - [MYG_HUMAN] | Myoglobin | 0.859 |
| 660 | Q5SYB0 | FERM and PDZ domain-containing protein 1 OS=Homo sapiens GN=FRMPD1 PE=1 SV=1 - [FRPD1_HUMAN] | FERM and PDZ domain-containing protein 1 | 0.859 |
| 661 | P03951 | Coagulation factor XI OS=Homo sapiens GN=F11 PE=1 SV=1 - [FA11_HUMAN] | Coagulation factor XI | 0.859 |
| 662 | Q9UK55 | Protein Z-dependent protease inhibitor OS=Homo sapiens GN=SERPINA10 PE=1 SV=1 - [ZPI_HUMAN] | Protein Z-dependent protease inhibitor | 0.858 |
| 663 | P02743 | Serum amyloid P-component OS=Homo sapiens GN=APCS PE=1 SV=2 - [SAMP_HUMAN] | Serum amyloid P-component | 0.858 |
| 664 | Q9H8L6 | Multimerin-2 OS=Homo sapiens GN=MMRN2 PE=1 SV=2 - [MMRN2_HUMAN] | Multimerin-2 | 0.858 |
| 665 | P07307 | Asialoglycoprotein receptor 2 OS=Homo sapiens GN=ASGR2 PE=1 SV=2 - [ASGR2_HUMAN] | Asialoglycoprotein receptor 2 | 0.857 |
| 666 | P01834 | Ig kappa chain C region OS=Homo sapiens GN=IGKC PE=1 SV=1 - [IGKC_HUMAN] | Ig kappa chain C region | 0.857 |
| 667 | P52848 | Bifunctional heparan sulfate N-deacetylase/N-sulfotransferase 1 OS=Homo sapiens GN=NDST1 PE=1 SV=1 - [NDST1_HUMAN] | Bifunctional heparan sulfate N-deacetylase/N-sulfotransferase 1 | 0.857 |
| 668 | P01706 | Immunoglobulin lambda variable 2-11 OS=Homo sapiens GN=IGLV2-11 PE=1 SV=2 - [LV211_HUMAN] | Immunoglobulin lambda variable 2-11 | 0.857 |
| 669 | P01768 | Immunoglobulin heavy variable 3-30 OS=Homo sapiens GN=IGHV3-30 PE=1 SV=2 - [HV330_HUMAN] | Immunoglobulin heavy variable 3-30 | 0.856 |
| 670 | P02649 | Apolipoprotein E OS=Homo sapiens GN=APOE PE=1 SV=1 - [APOE_HUMAN] | Apolipoprotein E | 0.856 |
| 671 | P01825 | Immunoglobulin heavy variable 4-59 OS=Homo sapiens GN=IGHV4-59 PE=1 SV=2 - [HV459_HUMAN] | Immunoglobulin heavy variable 4-59 | 0.855 |
| 672 | P00751 | Complement factor B OS=Homo sapiens GN=CFB PE=1 SV=2 - [CFAB_HUMAN] | Complement factor B | 0.855 |
| 673 | O75015 | Low affinity immunoglobulin gamma Fc region receptor III-B OS=Homo sapiens GN=FCGR3B PE=1 SV=2 - [FCG3B_HUMAN] | Low affinity immunoglobulin gamma Fc region receptor III-B | 0.853 |
| 674 | P06727 | Apolipoprotein A-IV OS=Homo sapiens GN=APOA4 PE=1 SV=3 - [APOA4_HUMAN] | Apolipoprotein A-IV | 0.852 |
| 675 | Q8N1L4 | Putative inactive cytochrome P450 family member 4Z2 OS=Homo sapiens GN=CYP4Z2P PE=5 SV=2 - [CP4Z2_HUMAN] | Putative inactive cytochrome P450 family member 4Z2 | 0.852 |
| 676 | P36980 | Complement factor H-related protein 2 OS=Homo sapiens GN=CFHR2 PE=1 SV=1 - [FHR2_HUMAN] | Complement factor H-related protein 2 | 0.851 |
| 677 | A0A0B4J1Y8 | Immunoglobulin lambda variable 9-49 OS=Homo sapiens GN=IGLV9-49 PE=1 SV=1 - [LV949_HUMAN] | Immunoglobulin lambda variable 9-49 | 0.851 |
| 678 | P01701 | Immunoglobulin lambda variable 1-51 OS=Homo sapiens GN=IGLV1-51 PE=1 SV=2 - [LV151_HUMAN] | Immunoglobulin lambda variable 1-51 | 0.851 |
| 679 | P48740 | Mannan-binding lectin serine protease 1 OS=Homo sapiens GN=MASP1 PE=1 SV=3 - [MASP1_HUMAN] | Mannan-binding lectin serine protease 1 | 0.850 |
| 680 | Q10588 | ADP-ribosyl cyclase/cyclic ADP-ribose hydrolase 2 OS=Homo sapiens GN=BST1 PE=1 SV=2 - [BST1_HUMAN] | ADP-ribosyl cyclase/cyclic ADP-ribose hydrolase 2 | 0.850 |
| 681 | Q9BWP8 | Collectin-11 OS=Homo sapiens GN=COLEC11 PE=1 SV=1 - [COL11_HUMAN] | Collectin-11 | 0.849 |
| 682 | P17936 | Insulin-like growth factor-binding protein 3 OS=Homo sapiens GN=IGFBP3 PE=1 SV=2 - [IBP3_HUMAN] | Insulin-like growth factor-binding protein 3 | 0.849 |
| 683 | Q6NT04 | Tigger transposable element-derived protein 7 OS=Homo sapiens GN=TIGD7 PE=1 SV=1 - [TIGD7_HUMAN] | Tigger transposable element-derived protein 7 | 0.849 |
| 684 | P03952 | Plasma kallikrein OS=Homo sapiens GN=KLKB1 PE=1 SV=1 - [KLKB1_HUMAN] | Plasma kallikrein | 0.849 |
| 685 | P02774 | Vitamin D-binding protein OS=Homo sapiens GN=GC PE=1 SV=1 - [VTDB_HUMAN] | Vitamin D-binding protein | 0.848 |
| 686 | P04220 | Ig mu heavy chain disease protein OS=Homo sapiens PE=1 SV=1 - [MUCB_HUMAN] | Ig mu heavy chain | 0.846 |
| 687 | P49908 | Selenoprotein P OS=Homo sapiens GN=SELENOP PE=1 SV=3 - [SEPP1_HUMAN] | Selenoprotein P | 0.845 |
| 688 | P06312 | Immunoglobulin kappa variable 4-1 OS=Homo sapiens GN=IGKV4-1 PE=1 SV=1 - [KV401_HUMAN] | Immunoglobulin kappa variable 4-1 | 0.845 |
| 689 | P49913 | Cathelicidin antimicrobial peptide OS=Homo sapiens GN=CAMP PE=1 SV=1 - [CAMP_HUMAN] | Cathelicidin antimicrobial peptide | 0.844 |
| 690 | P01599 | Immunoglobulin kappa variable 1-17 OS=Homo sapiens GN=IGKV1-17 PE=1 SV=2 - [KV117_HUMAN] | Immunoglobulin kappa variable 1-17 | 0.844 |
| 691 | P01042 | Kininogen-1 OS=Homo sapiens GN=KNG1 PE=1 SV=2 - [KNG1_HUMAN] | Kininogen-1 | 0.842 |
| 692 | Q14624 | Inter-alpha-trypsin inhibitor heavy chain H4 OS=Homo sapiens GN=ITIH4 PE=1 SV=4 - [ITIH4_HUMAN] | Inter-alpha-trypsin inhibitor heavy chain H4 | 0.842 |
| 693 | Q8TDX9 | Polycystic kidney disease protein 1-like 1 OS=Homo sapiens GN=PKD1L1 PE=1 SV=1 - [PK1L1_HUMAN] | Polycystic kidney disease protein 1-like 1 | 0.841 |
| 694 | P78509 | Reelin OS=Homo sapiens GN=RELN PE=1 SV=3 - [RELN_HUMAN] | Reelin | 0.841 |
| 695 | Q8IYJ0 | PILR alpha-associated neural protein OS=Homo sapiens GN=PIANP PE=2 SV=1 - [PIANP_HUMAN] | PILR alpha-associated neural protein | 0.841 |
| 696 | P0C0L5 | Complement C4-B OS=Homo sapiens GN=C4B PE=1 SV=2 - [CO4B_HUMAN] | Complement C4-B | 0.841 |
| 697 | P24593 | Insulin-like growth factor-binding protein 5 OS=Homo sapiens GN=IGFBP5 PE=1 SV=1 - [IBP5_HUMAN] | Insulin-like growth factor-binding protein 5 | 0.839 |
| 698 | P55103 | Inhibin beta C chain OS=Homo sapiens GN=INHBC PE=2 SV=1 - [INHBC_HUMAN] | Inhibin beta C chain | 0.838 |
| 699 | Q92954 | Proteoglycan 4 OS=Homo sapiens GN=PRG4 PE=1 SV=2 - [PRG4_HUMAN] | Proteoglycan 4 | 0.838 |
| 700 | P00736 | Complement C1r subcomponent OS=Homo sapiens GN=C1R PE=1 SV=2 - [C1R_HUMAN] | Complement C1r subcomponent | 0.837 |
| 701 | P18065 | Insulin-like growth factor-binding protein 2 OS=Homo sapiens GN=IGFBP2 PE=1 SV=2 - [IBP2_HUMAN] | Insulin-like growth factor-binding protein 2 | 0.836 |
| 702 | P40967 | Melanocyte protein PMEL OS=Homo sapiens GN=PMEL PE=1 SV=2 - [PMEL_HUMAN] | Melanocyte protein PMEL | 0.836 |
| 703 | P06396 | Gelsolin OS=Homo sapiens GN=GSN PE=1 SV=1 - [GELS_HUMAN] | Gelsolin | 0.836 |
| 704 | A0A075B6I9 | Immunoglobulin lambda variable 7-46 OS=Homo sapiens GN=IGLV7-46 PE=3 SV=4 - [LV746_HUMAN] | Immunoglobulin lambda variable 7-46 | 0.836 |
| 705 | Q14520 | Hyaluronan-binding protein 2 OS=Homo sapiens GN=HABP2 PE=1 SV=1 - [HABP2_HUMAN] | Hyaluronan-binding protein 2 | 0.835 |
| 706 | P01709 | Immunoglobulin lambda variable 2-8 OS=Homo sapiens GN=IGLV2-8 PE=1 SV=2 - [LV208_HUMAN] | Immunoglobulin lambda variable 2-8 | 0.834 |
| 707 | P02749 | Beta-2-glycoprotein 1 OS=Homo sapiens GN=APOH PE=1 SV=3 - [APOH_HUMAN] | Beta-2-glycoprotein 1 | 0.833 |
| 708 | A0A087WSZ0 | Immunoglobulin kappa variable 1D-8 OS=Homo sapiens GN=IGKV1D-8 PE=3 SV=6 - [KVD08_HUMAN] | Immunoglobulin kappa variable 1D-8 | 0.833 |
| 709 | Q9Y5Y7 | Lymphatic vessel endothelial hyaluronic acid receptor 1 OS=Homo sapiens GN=LYVE1 PE=1 SV=2 - [LYVE1_HUMAN] | Lymphatic vessel endothelial hyaluronic acid recept | 0.830 |
| 710 | P11597 | Cholesteryl ester transfer protein OS=Homo sapiens GN=CETP PE=1 SV=2 - [CETP_HUMAN] | Cholesteryl ester transfer protein | 0.830 |
| 711 | P04114 | Apolipoprotein B-100 OS=Homo sapiens GN=APOB PE=1 SV=2 - [APOB_HUMAN] | Apolipoprotein B-100 | 0.830 |
| 712 | P04003 | C4b-binding protein alpha chain OS=Homo sapiens GN=C4BPA PE=1 SV=2 - [C4BPA_HUMAN] | C4b-binding protein alpha chain | 0.829 |
| 713 | A0A0C4DH68 | Immunoglobulin kappa variable 2-24 OS=Homo sapiens GN=IGKV2-24 PE=3 SV=1 - [KV224_HUMAN] | Immunoglobulin kappa variable 2-24 | 0.828 |
| 714 | P02748 | Complement component C9 OS=Homo sapiens GN=C9 PE=1 SV=2 - [CO9_HUMAN] | Complement component C9 | 0.826 |
| 715 | Q9H158 | Protocadherin alpha-C1 OS=Homo sapiens GN=PCDHAC1 PE=2 SV=2 - [PCDC1_HUMAN] | Protocadherin alpha-C1 | 0.826 |
| 716 | P02775 | Platelet basic protein OS=Homo sapiens GN=PPBP PE=1 SV=3 - [CXCL7_HUMAN] | Platelet basic protein | 0.824 |
| 717 | P02656 | Apolipoprotein C-III OS=Homo sapiens GN=APOC3 PE=1 SV=1 - [APOC3_HUMAN] | Apolipoprotein C-III | 0.822 |
| 718 | Q13275 | Semaphorin-3F OS=Homo sapiens GN=SEMA3F PE=2 SV=2 - [SEM3F_HUMAN] | Semaphorin-3F | 0.820 |
| 719 | P05546 | Heparin cofactor 2 OS=Homo sapiens GN=SERPIND1 PE=1 SV=3 - [HEP2_HUMAN] | Heparin cofactor 2 | 0.820 |
| 720 | P04004 | Vitronectin OS=Homo sapiens GN=VTN PE=1 SV=1 - [VTNC_HUMAN] | Vitronectin | 0.817 |
| 721 | P02538 | Keratin, type II cytoskeletal 6A OS=Homo sapiens GN=KRT6A PE=1 SV=3 - [K2C6A_HUMAN] | Keratin, type II cytoskeletal 6A | 0.816 |
| 722 | P04430 | Immunoglobulin kappa variable 1-16 OS=Homo sapiens GN=IGKV1-16 PE=1 SV=2 - [KV116_HUMAN] | Immunoglobulin kappa variable 1-16 | 0.816 |
| 723 | P02652 | Apolipoprotein A-II OS=Homo sapiens GN=APOA2 PE=1 SV=1 - [APOA2_HUMAN] | Apolipoprotein A-II | 0.811 |
| 724 | P02679 | Fibrinogen gamma chain OS=Homo sapiens GN=FGG PE=1 SV=3 - [FIBG_HUMAN] | Fibrinogen gamma chain | 0.810 |
| 725 | A0A087WSX0 | Immunoglobulin lambda variable 5-45 OS=Homo sapiens GN=IGLV5-45 PE=3 SV=1 - [LV545_HUMAN] | Immunoglobulin lambda variable 5-45 | 0.808 |
| 726 | Q9Y6Z7 | Collectin-10 OS=Homo sapiens GN=COLEC10 PE=2 SV=2 - [COL10_HUMAN] | Collectin-10 | 0.808 |
| 727 | P01703 | Immunoglobulin lambda variable 1-40 OS=Homo sapiens GN=IGLV1-40 PE=1 SV=2 - [LV140_HUMAN] | Immunoglobulin lambda variable 1-40 | 0.805 |
| 728 | P00740 | Coagulation factor IX OS=Homo sapiens GN=F9 PE=1 SV=2 - [FA9_HUMAN] | Coagulation factor IX | 0.796 |
| 729 | A0A075B6R2 | Immunoglobulin heavy variable 4-4 OS=Homo sapiens GN=IGHV4-4 PE=3 SV=2 - [HV404_HUMAN] | Immunoglobulin heavy variable 4-4 | 0.796 |
| 730 | P02655 | Apolipoprotein C-II OS=Homo sapiens GN=APOC2 PE=1 SV=1 - [APOC2_HUMAN] | Apolipoprotein C-II | 0.796 |
| 731 | P59665 | Neutrophil defensin 1 OS=Homo sapiens GN=DEFA1 PE=1 SV=1 - [DEF1_HUMAN] | Neutrophil defensin 1 | 0.794 |
| 732 | Q13201 | Multimerin-1 OS=Homo sapiens GN=MMRN1 PE=1 SV=3 - [MMRN1_HUMAN] | Multimerin-1 | 0.793 |
| 733 | P07996 | Thrombospondin-1 OS=Homo sapiens GN=THBS1 PE=1 SV=2 - [TSP1_HUMAN] | Thrombospondin-1 | 0.791 |
| 734 | P0C0L4 | Complement C4-A OS=Homo sapiens GN=C4A PE=1 SV=2 - [CO4A_HUMAN] | Complement C4-A | 0.791 |
| 735 | P04259 | Keratin, type II cytoskeletal 6B OS=Homo sapiens GN=KRT6B PE=1 SV=5 - [K2C6B_HUMAN] | Keratin, type II cytoskeletal 6B | 0.791 |
| 736 | P18428 | Lipopolysaccharide-binding protein OS=Homo sapiens GN=LBP PE=1 SV=3 - [LBP_HUMAN] | Lipopolysaccharide-binding protein | 0.783 |
| 737 | P12259 | Coagulation factor V OS=Homo sapiens GN=F5 PE=1 SV=4 - [FA5_HUMAN] | Coagulation factor V | 0.779 |
| 738 | P02675 | Fibrinogen beta chain OS=Homo sapiens GN=FGB PE=1 SV=2 - [FIBB_HUMAN] | Fibrinogen beta chain | 0.761 |
| 739 | P02671 | Fibrinogen alpha chain OS=Homo sapiens GN=FGA PE=1 SV=2 - [FIBA_HUMAN] | Fibrinogen alpha chain | 0.753 |
| 740 | Q96I99 | Succinate--CoA ligase [GDP-forming] subunit beta, mitochondrial OS=Homo sapiens GN=SUCLG2 PE=1 SV=2 - [SUCB2_HUMAN] | Succinate--CoA ligase [GDP-forming] subunit beta, mitochondrial | 0.750 |
| 741 | P02654 | Apolipoprotein C-I OS=Homo sapiens GN=APOC1 PE=1 SV=1 - [APOC1_HUMAN] | Apolipoprotein C-I | 0.722 |
| 742 | P01344 | Insulin-like growth factor II OS=Homo sapiens GN=IGF2 PE=1 SV=1 - [IGF2_HUMAN] | Insulin-like growth factor II | 0.720 |
| 743 | P00734 | Prothrombin OS=Homo sapiens GN=F2 PE=1 SV=2 - [THRB_HUMAN] | Prothrombin | 0.719 |
| 744 | P00742 | Coagulation factor X OS=Homo sapiens GN=F10 PE=1 SV=2 - [FA10_HUMAN] | Coagulation factor X | 0.710 |
| 745 | O95810 | Serum deprivation-response protein OS=Homo sapiens GN=SDPR PE=1 SV=3 - [SDPR_HUMAN] | Serum deprivation-response protein | 0.709 |
| 746 | P05154 | Plasma serine protease inhibitor OS=Homo sapiens GN=SERPINA5 PE=1 SV=3 - [IPSP_HUMAN] | Plasma serine protease inhibitor | 0.701 |
| 747 | P04070 | Vitamin K-dependent protein C OS=Homo sapiens GN=PROC PE=1 SV=1 - [PROC_HUMAN] | Vitamin K-dependent protein C | 0.698 |
| 748 | P0DJI8 | Serum amyloid A-1 protein OS=Homo sapiens GN=SAA1 PE=1 SV=1 - [SAA1_HUMAN] | Serum amyloid A-1 protein | 0.670 |
| 749 | A1L4K1 | Fibronectin type III and SPRY domain-containing protein 2 OS=Homo sapiens GN=FSD2 PE=1 SV=1 - [FSD2_HUMAN] | Fibronectin type III and SPRY domain-containing protein 2 | 0.660 |
| 750 | Q96NZ9 | Proline-rich acidic protein 1 OS=Homo sapiens GN=PRAP1 PE=1 SV=2 - [PRAP1_HUMAN] | Proline-rich acidic protein 1 | 0.658 |
| 751 | P02776 | Platelet factor 4 OS=Homo sapiens GN=PF4 PE=1 SV=2 - [PLF4_HUMAN] | Platelet factor 4 | 0.517 |
| 752 | O76013 | Keratin, type I cuticular Ha6 OS=Homo sapiens GN=KRT36 PE=2 SV=1 - [KRT36_HUMAN] | Keratin, type I cuticular Ha6 | 0.498 |
